# Supplementary material
Source: PubMed Central journal article supplement (PMC5763244)

# 3 Color Lyoplate results

Selection

# A549GEV16/BOK

No TGF; No 4OHT

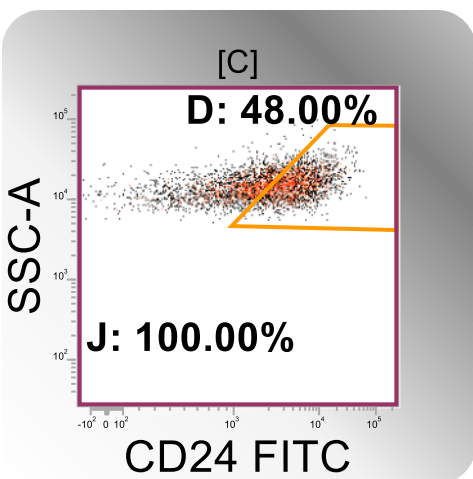

TGF; No 4OHT

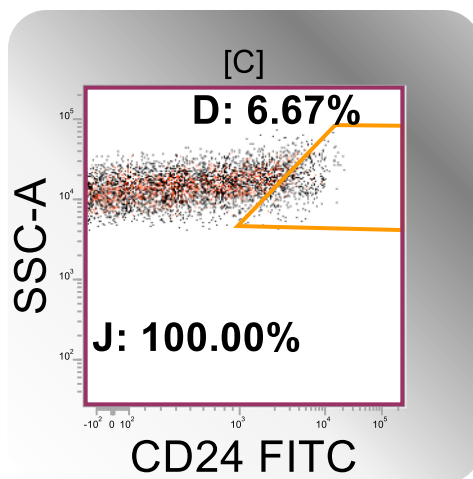

No TGF; 4OHT

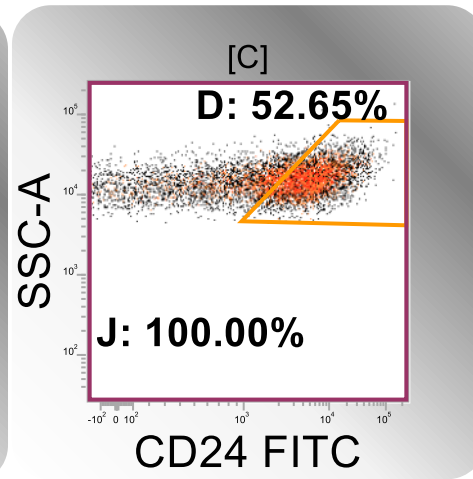

TGF; 4OHT

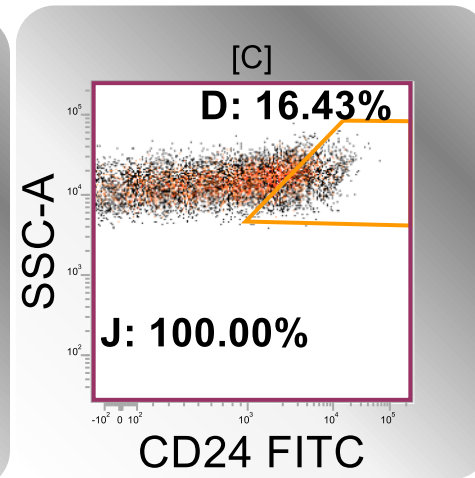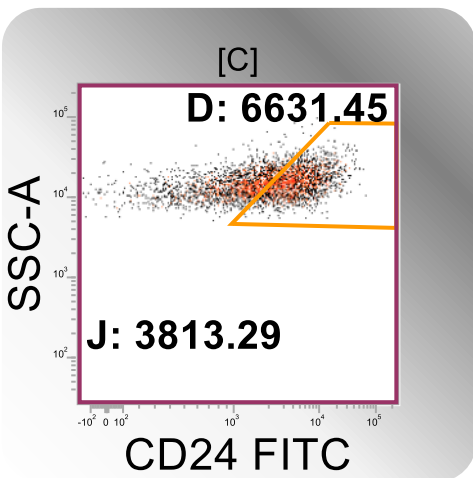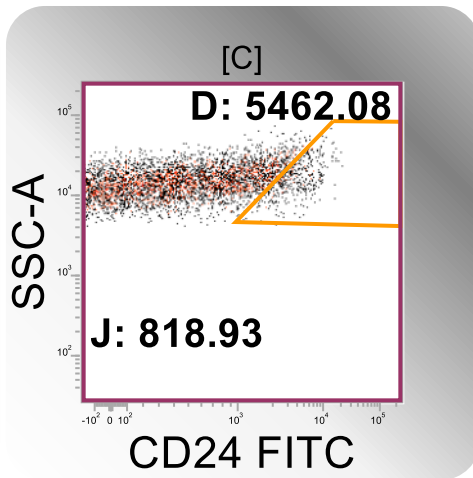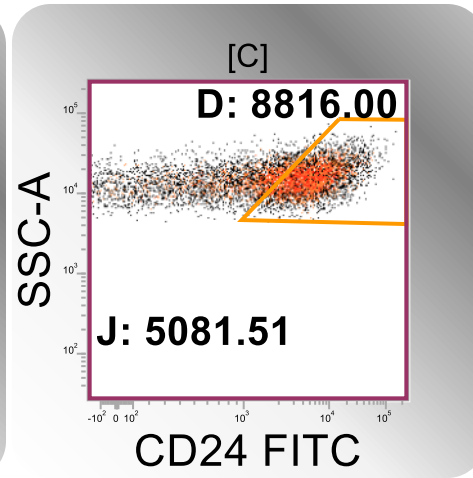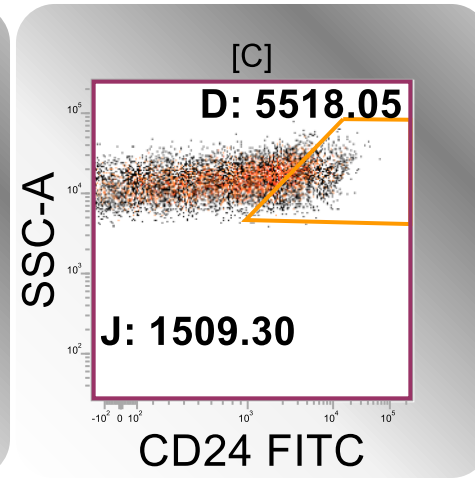

# A549GEV16/BOK

No TGF; No 4OHT

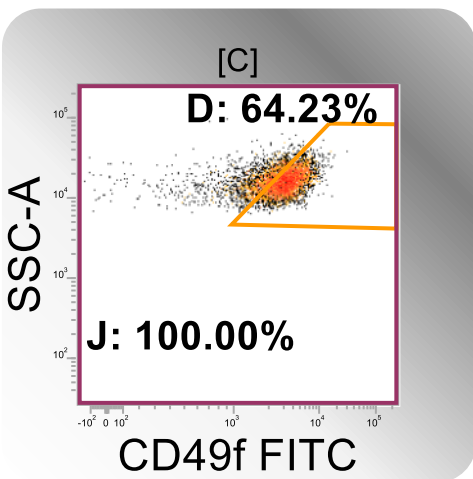

TGF; No 4OHT

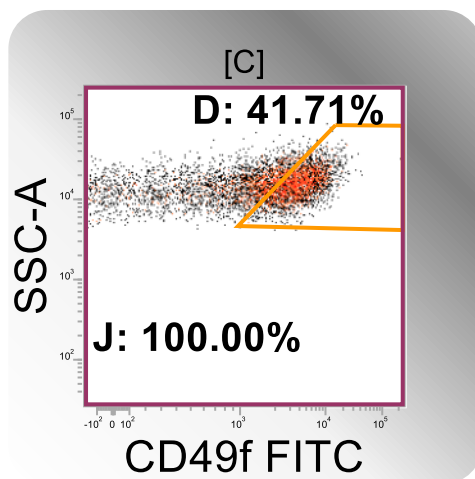

No TGF; 4OHT

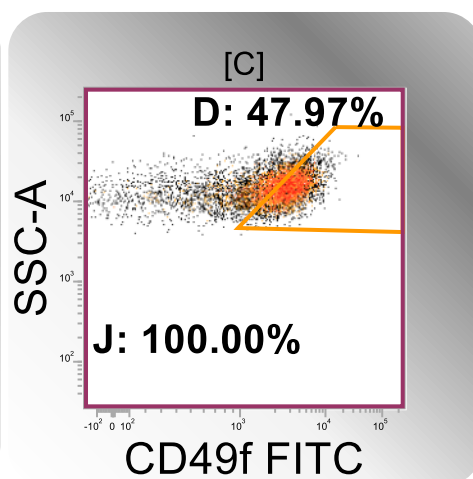

TGF; 4OHT

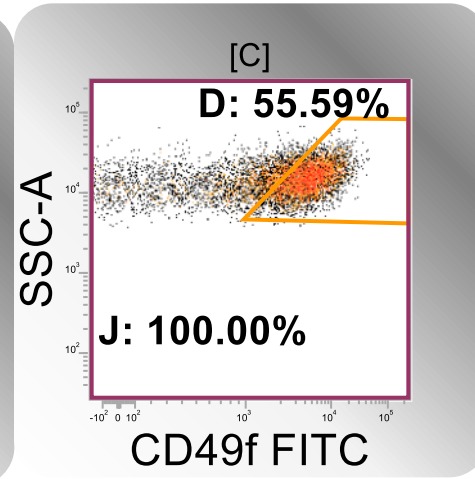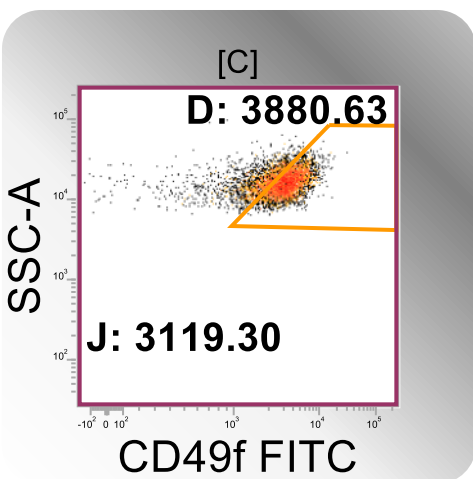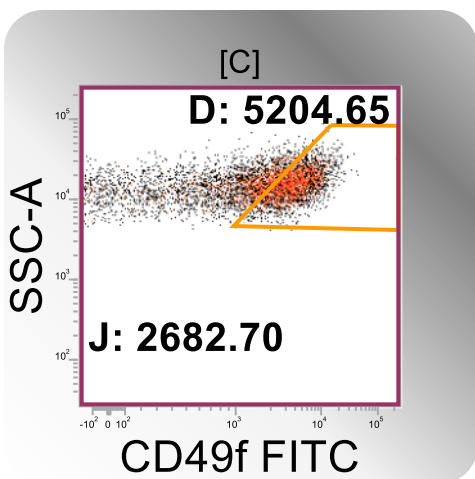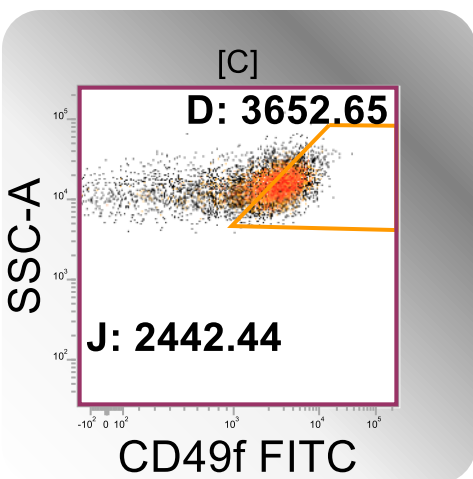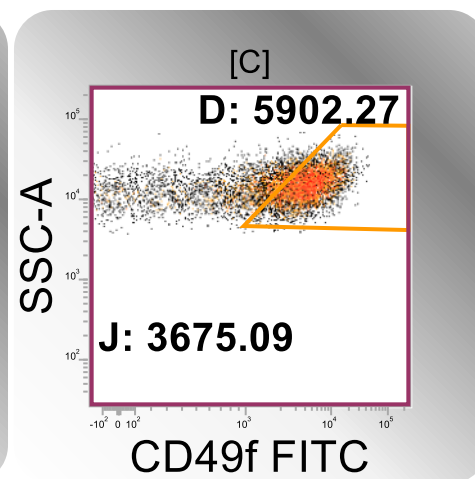

# A549GEV16/BOK

No TGF; No 4OHT

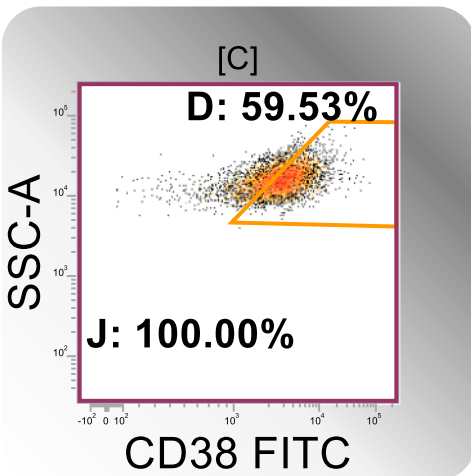

TGF; No 4OHT

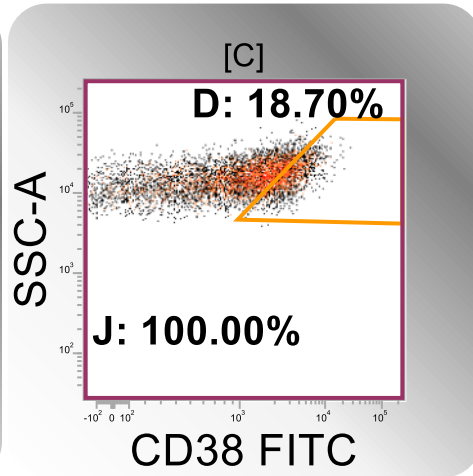

No TGF; 4OHT

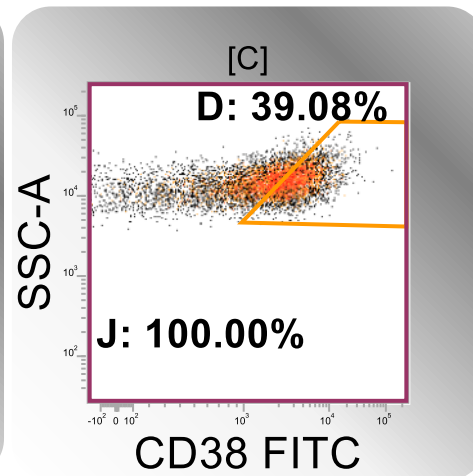

TGF; 4OHT

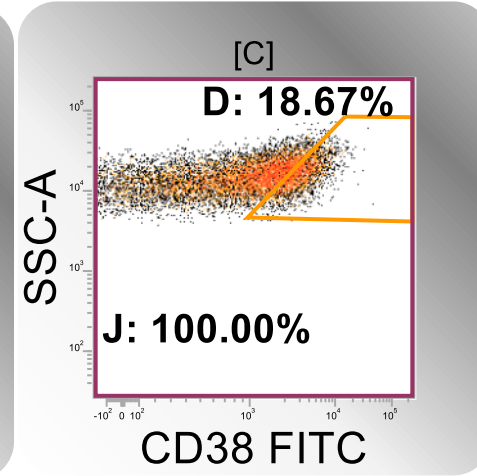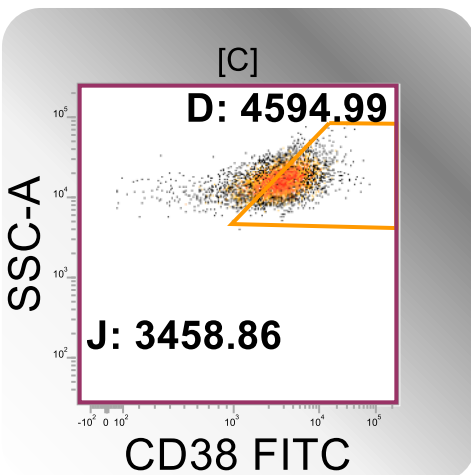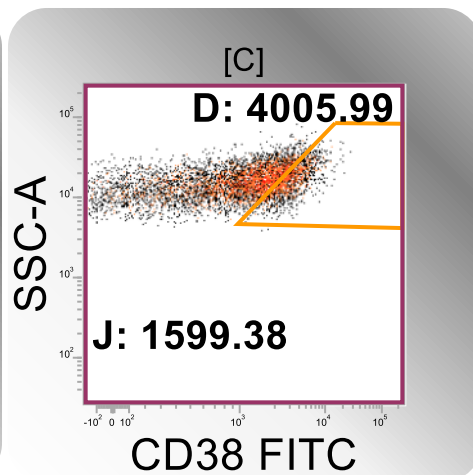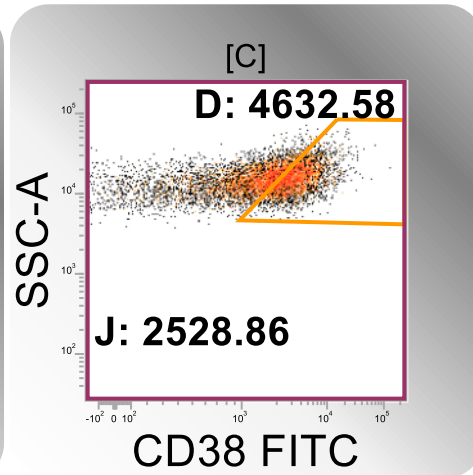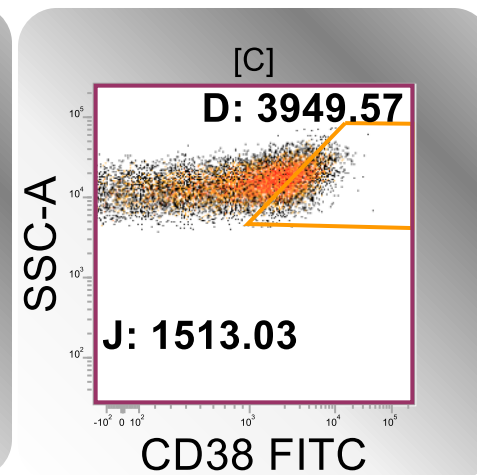

# A549GEV16/BOK

No TGF; No 4OHT

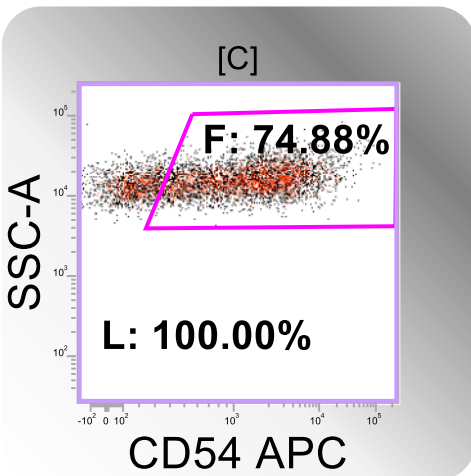

TGF; No 4OHT

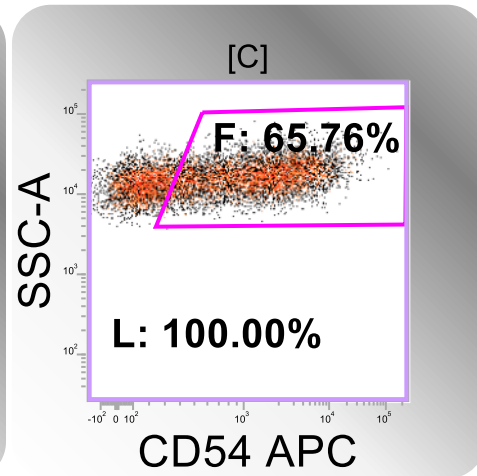

No TGF; 4OHT

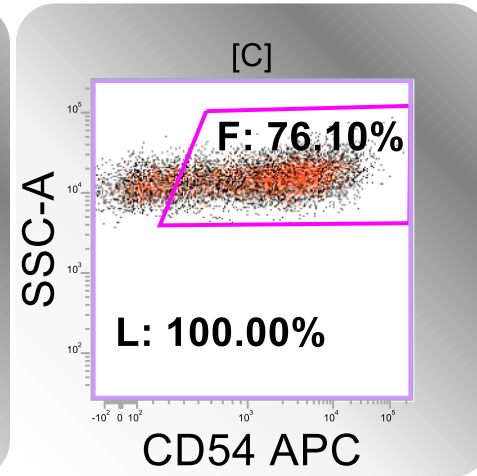

TGF; 4OHT

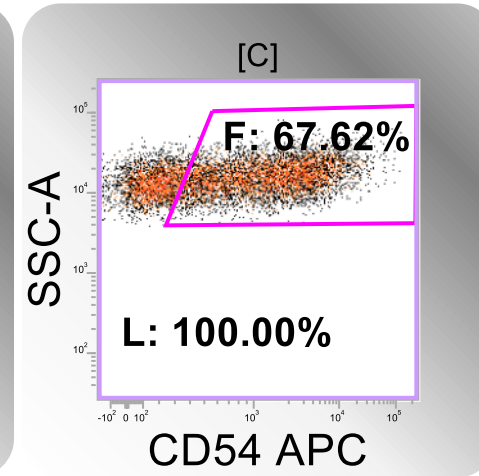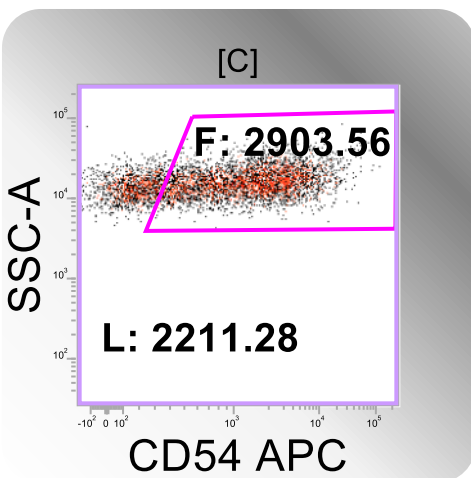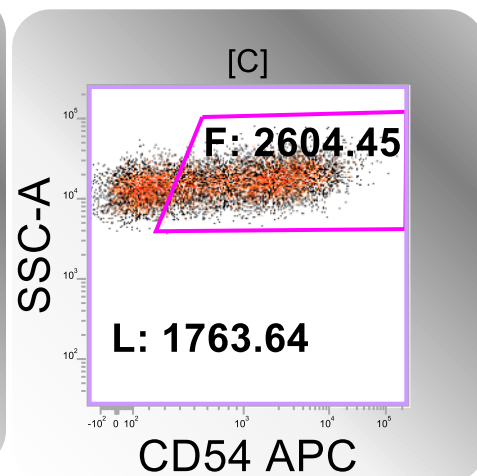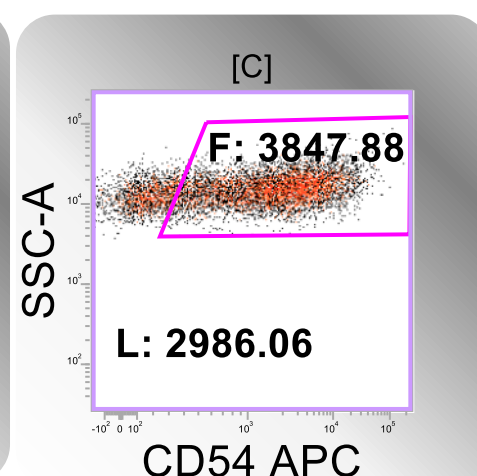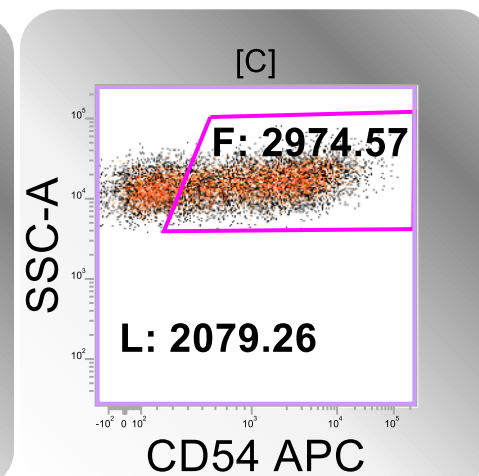

# A549GEV16/BOK

No TGF; No 4OHT

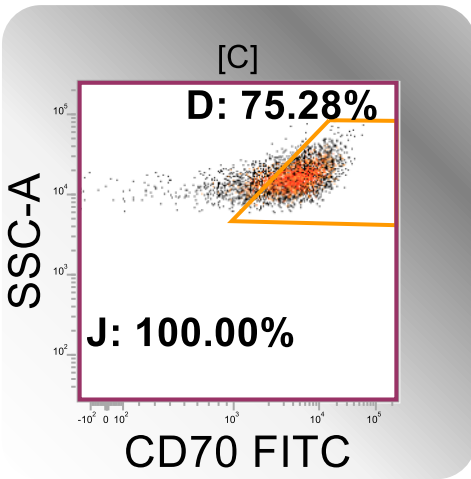

TGF; No 4OHT

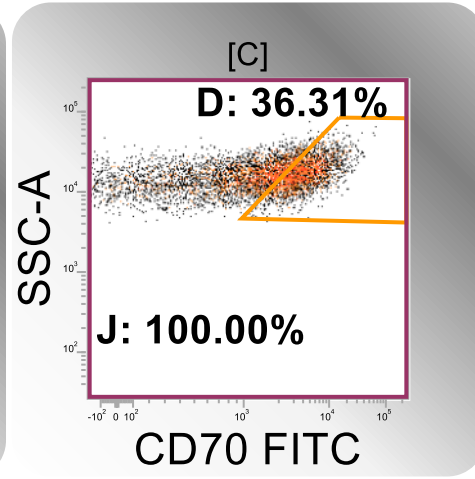

No TGF; 4OHT

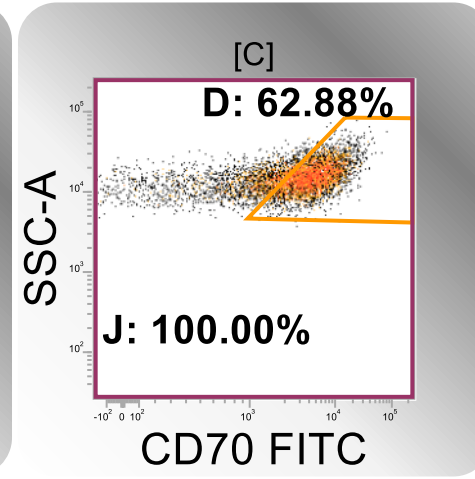

TGF; 4OHT

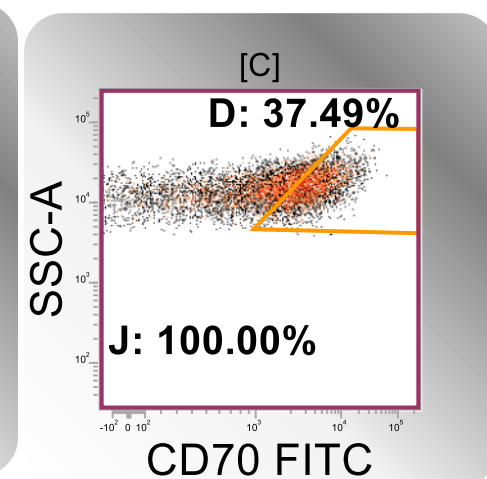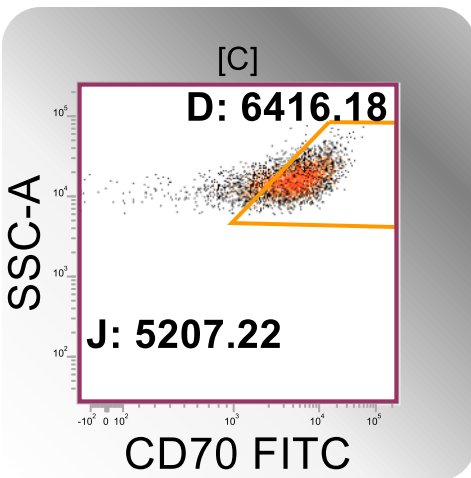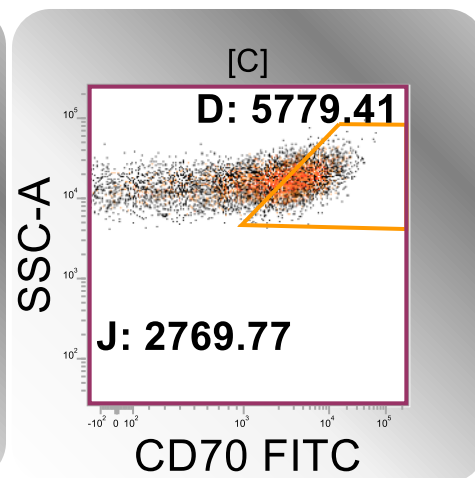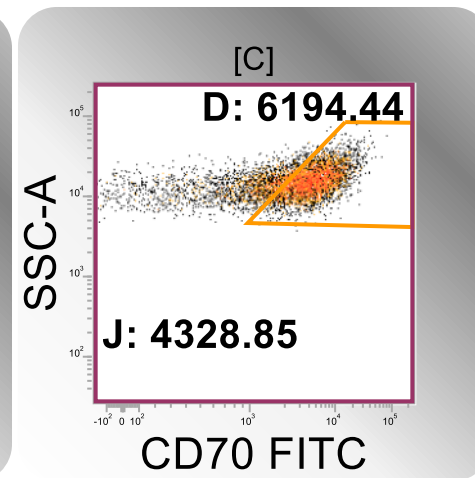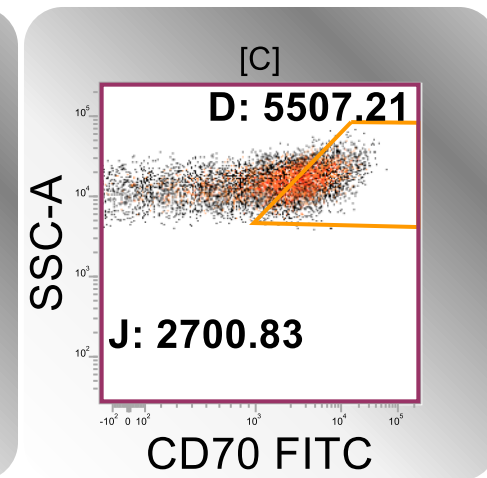

# A549GEV16/BOK

No TGF; No 4OHT

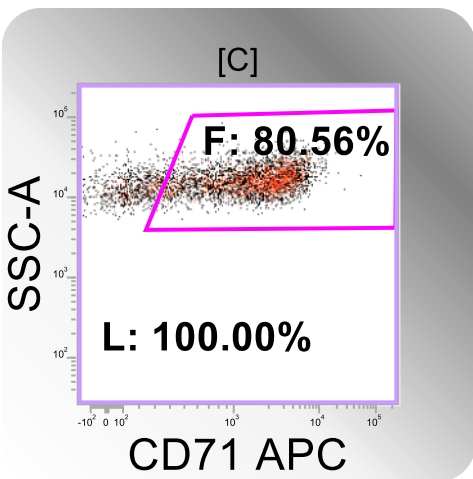

TGF; No 4OHT

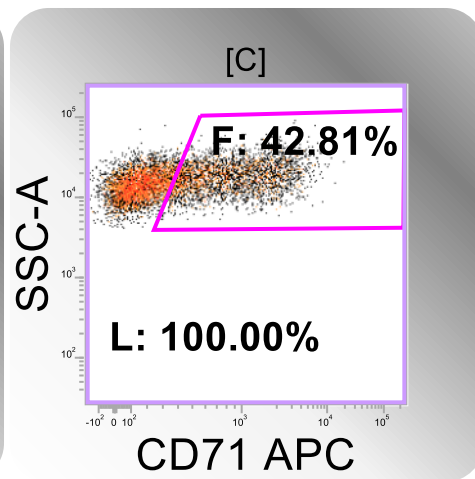

No TGF; 4OHT

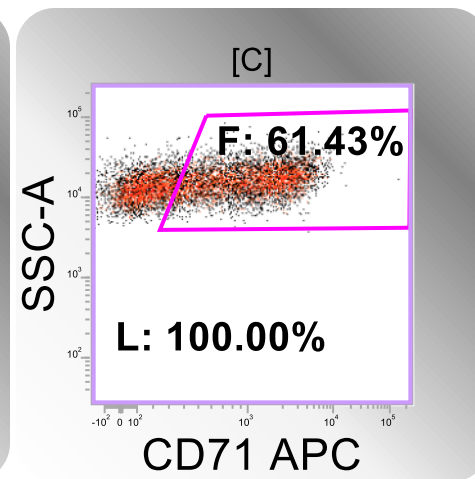

TGF; 4OHT

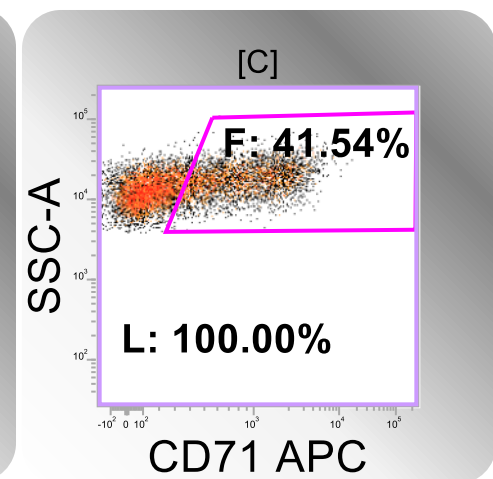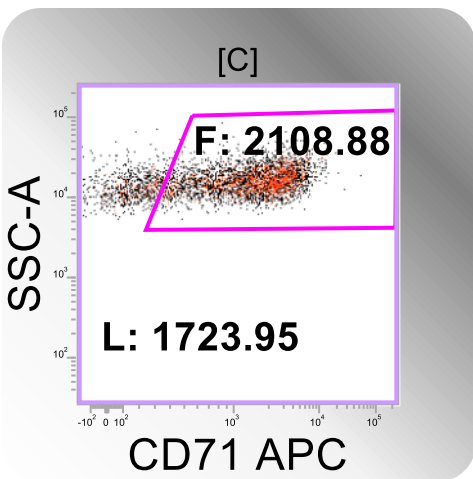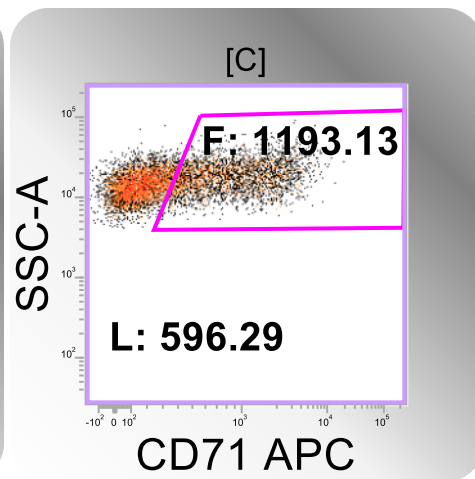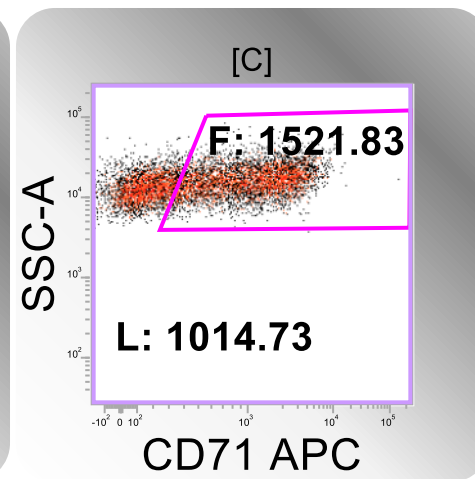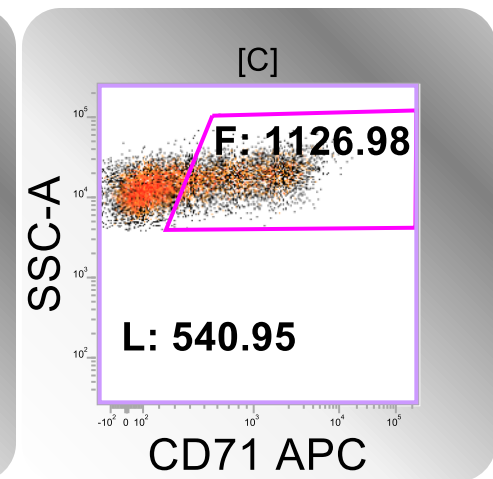



# A549GEV16/BOK

No TGF; No 4OHT

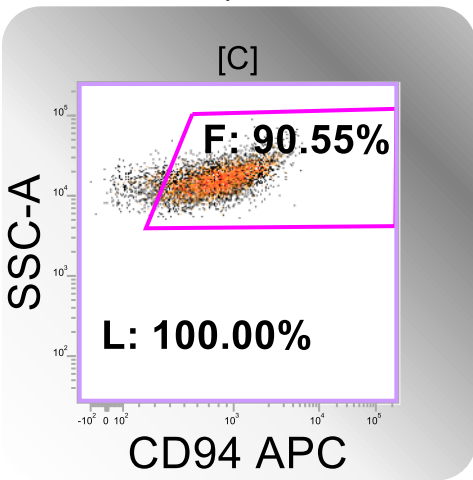

TGF; No 4OHT

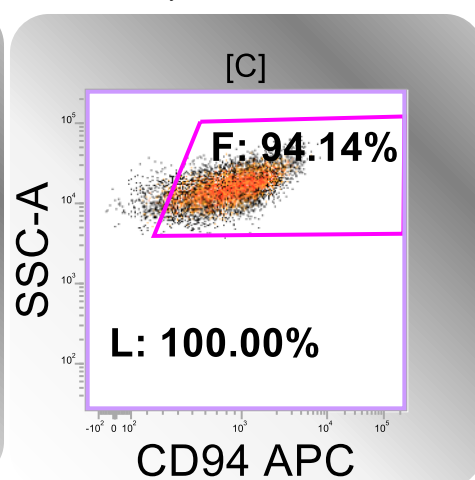

No TGF; 4OHT

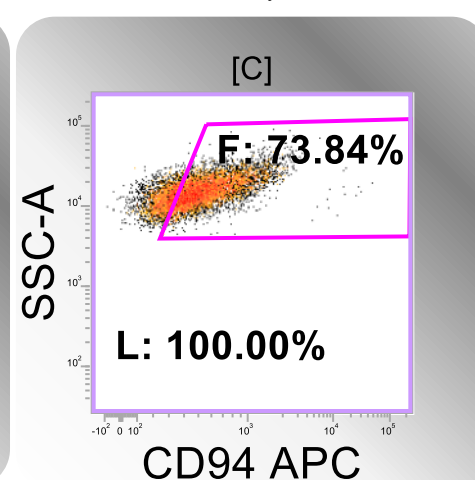

TGF; 4OHT

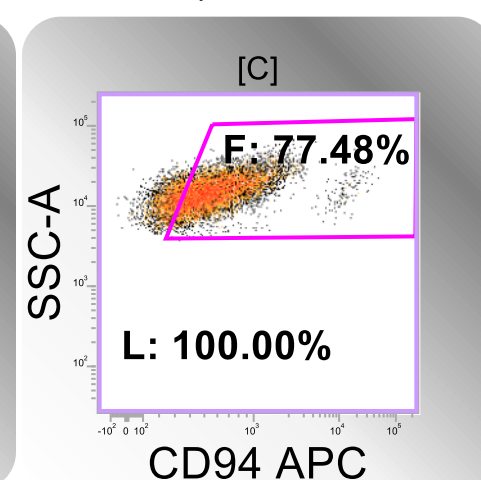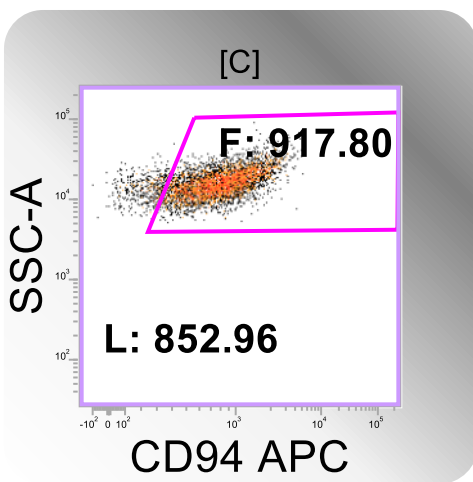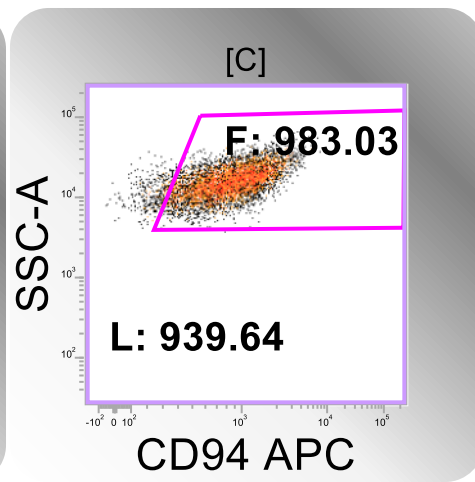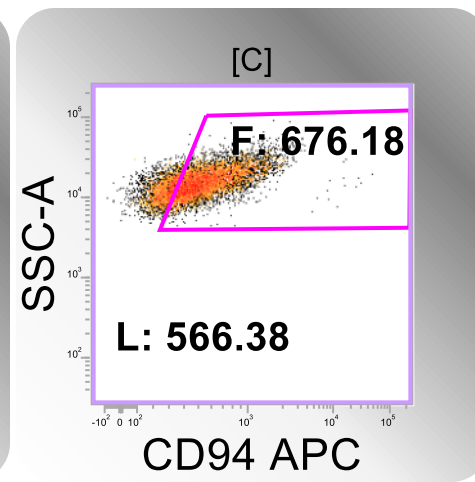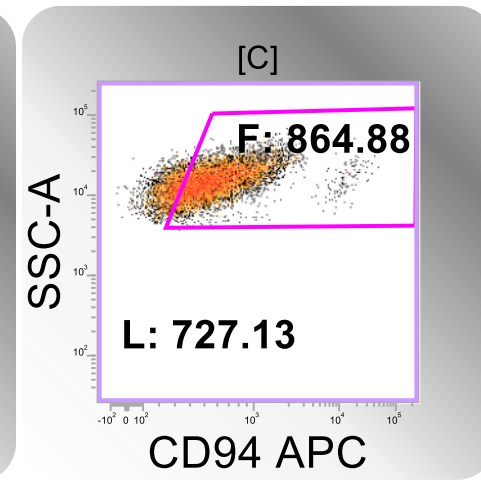



# A549GEV16/BOK

No TGF; No 4OHT

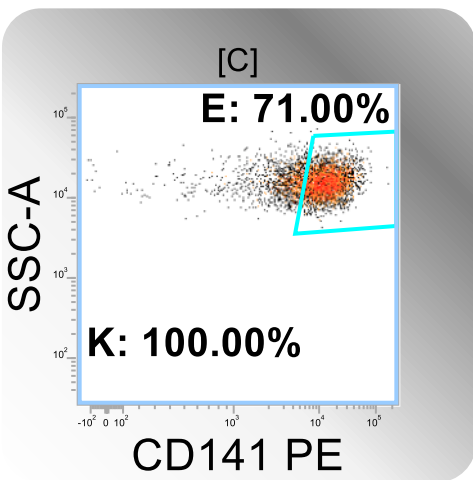

TGF; No 4OHT

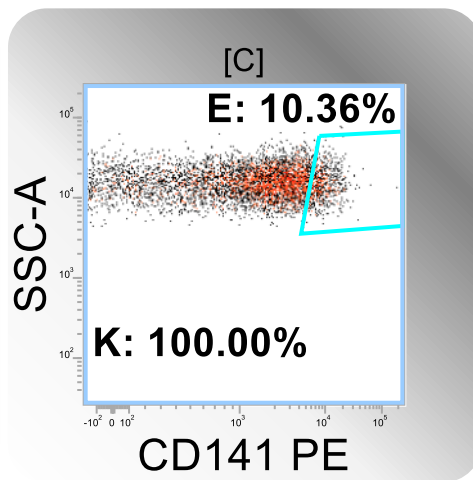

No TGF; 4OHT

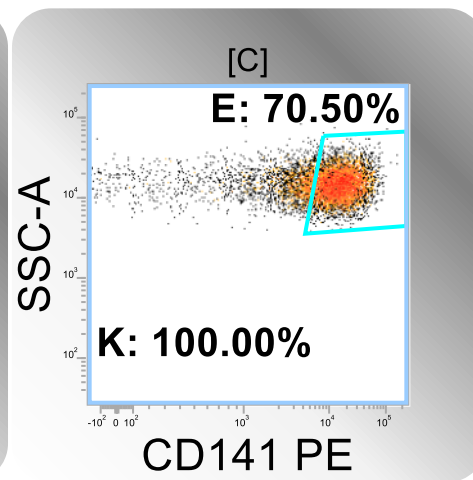

TGF; 4OHT

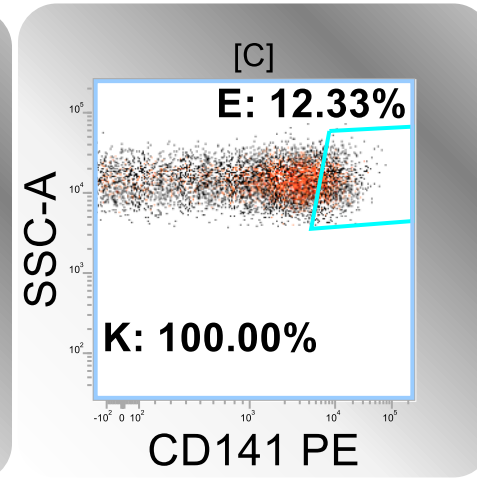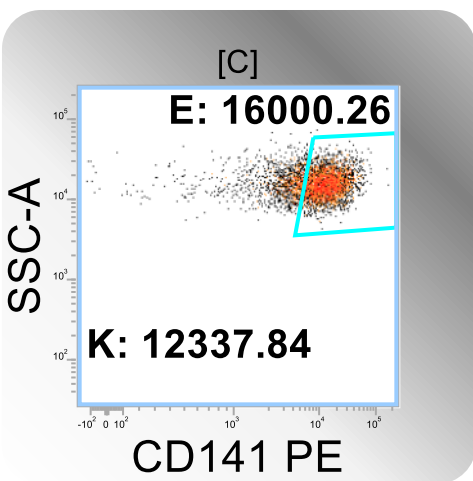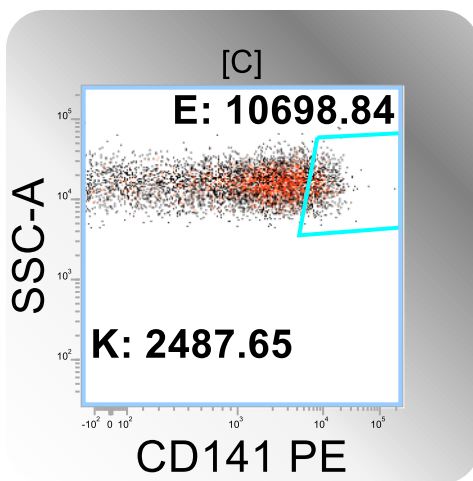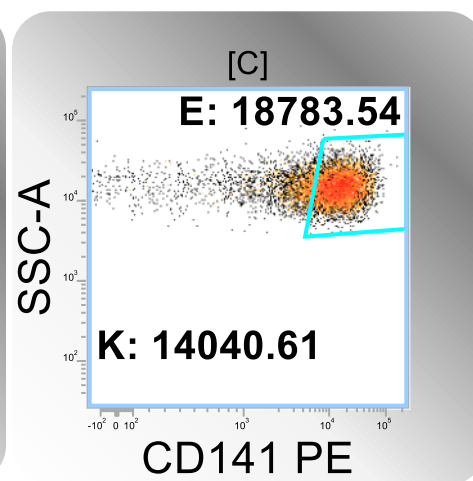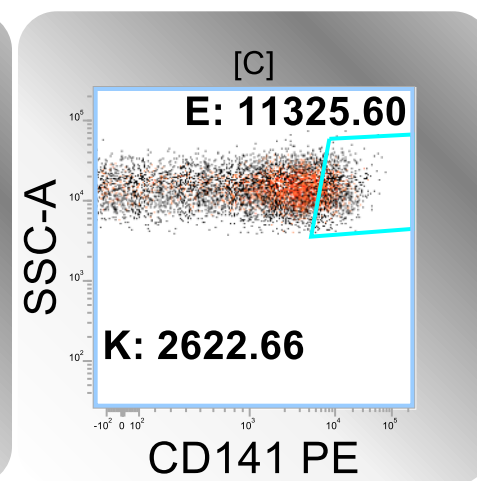

# A549GEV16/BOK

No TGF; No 4OHT

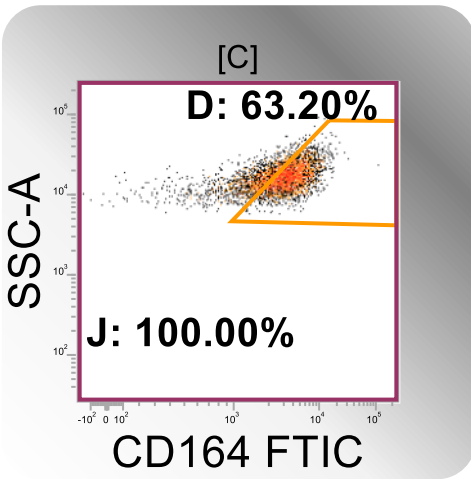

TGF; No 4OHT

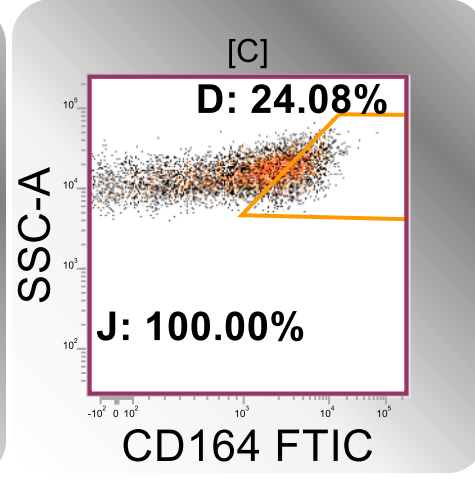

No TGF; 4OHT

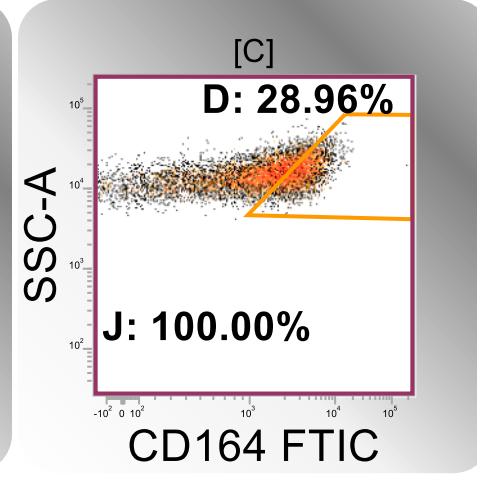

TGF; 4OHT

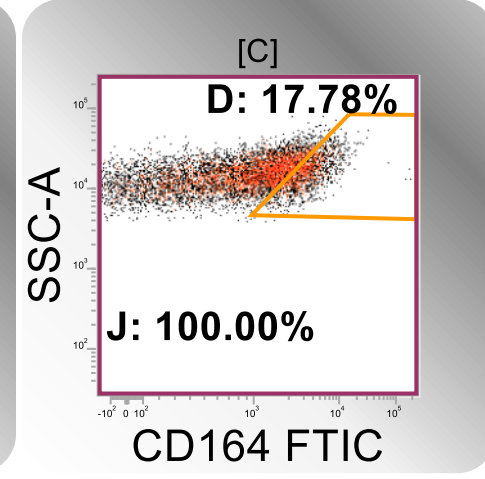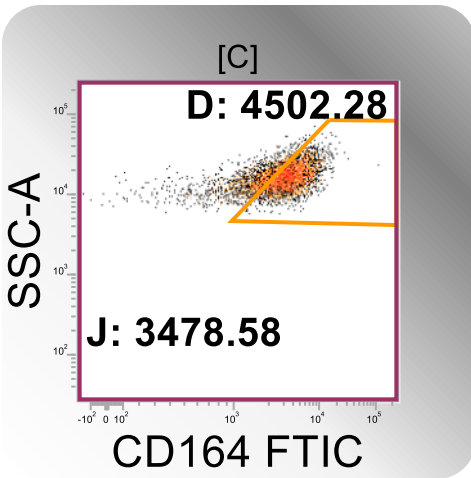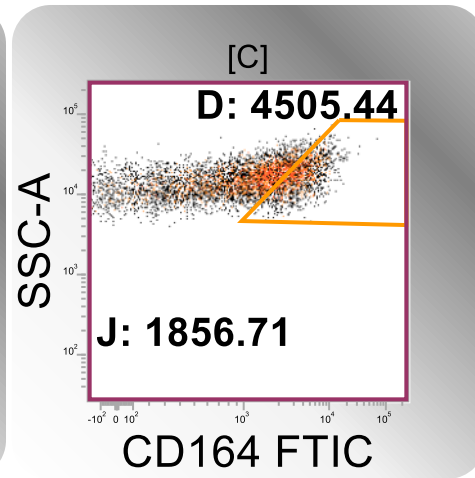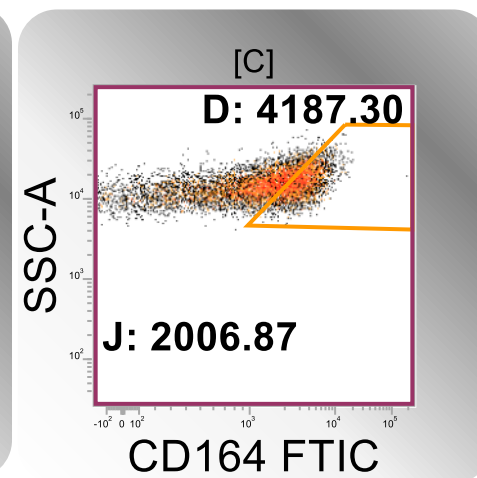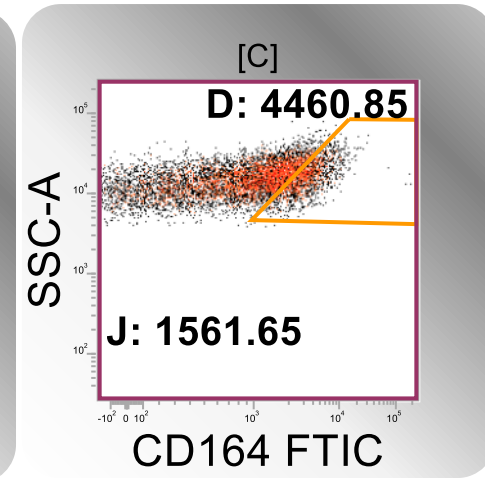

# A549GEV16/BOK

No TGF; No 4OHT

TGF; No 4OHT

No TGF; 4OHT

TGF; 4OHT

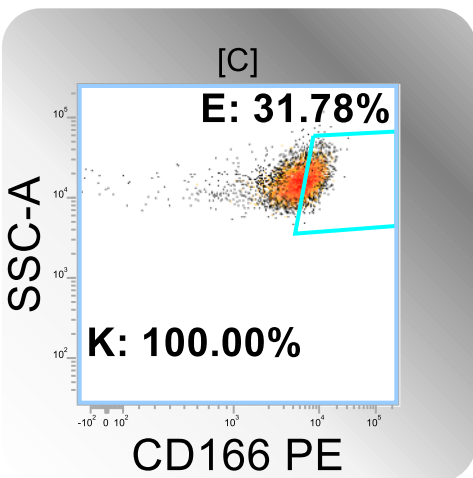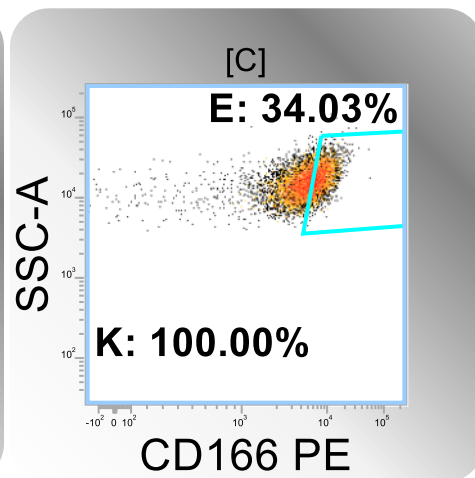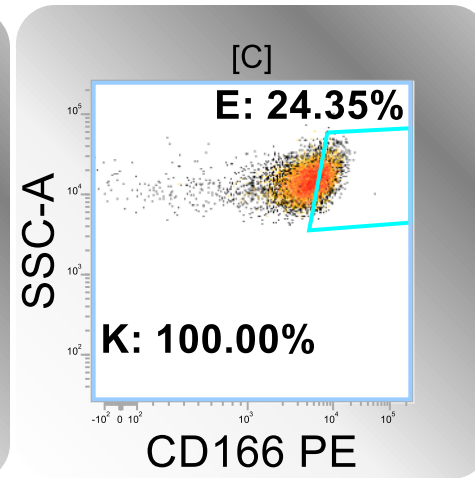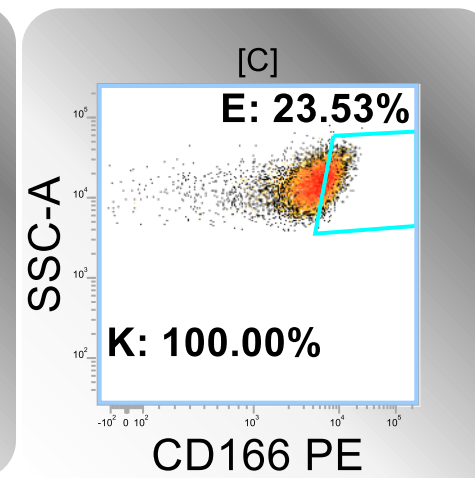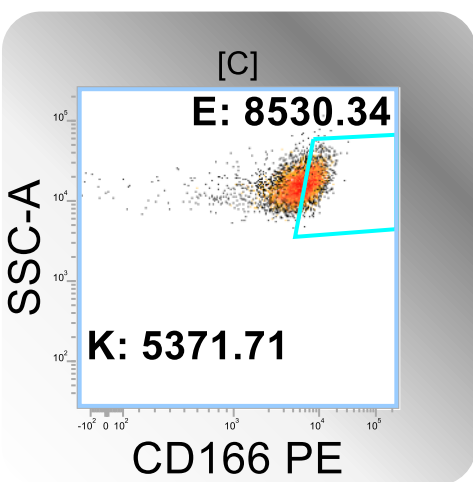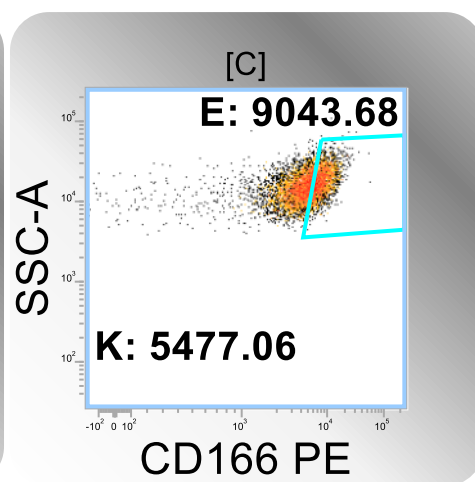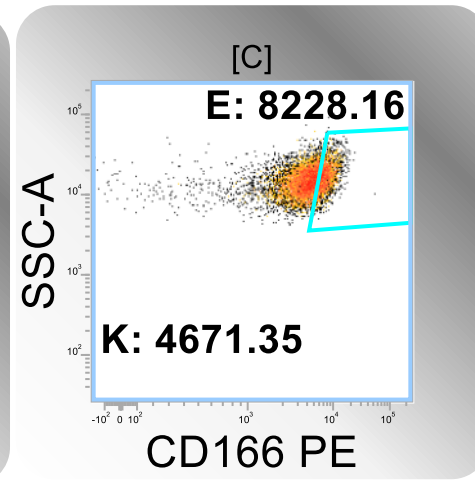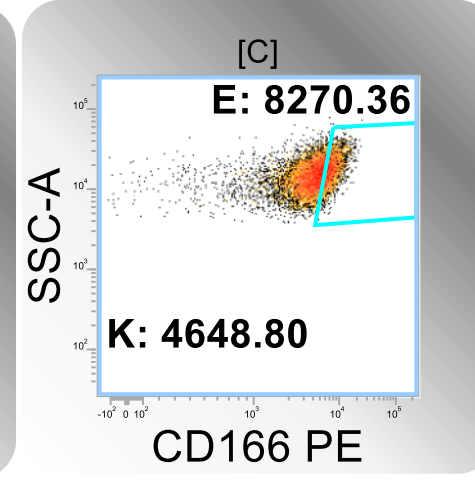

# A549GEV16/BOK

No TGF; No 4OHT

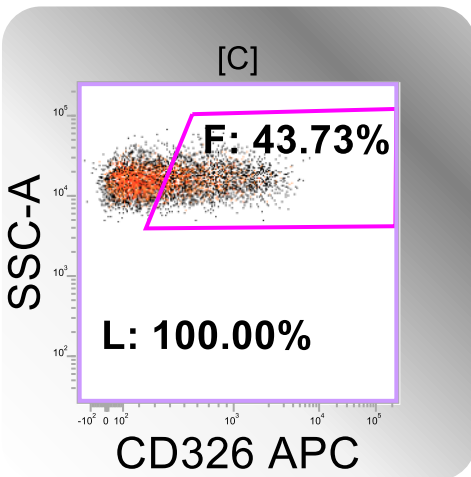

TGF; No 4OHT

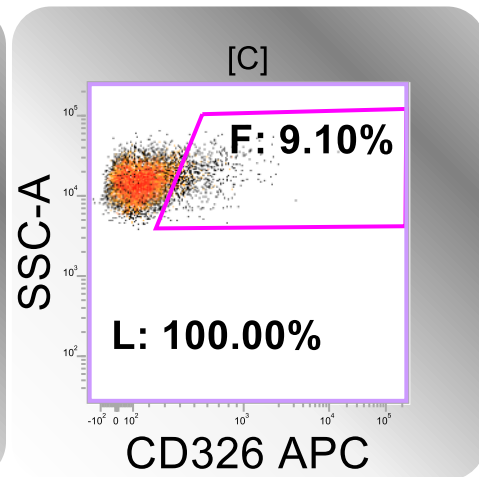

No TGF; 4OHT

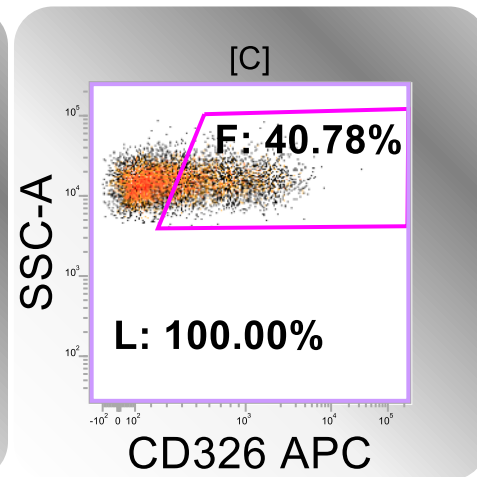

TGF; 4OHT

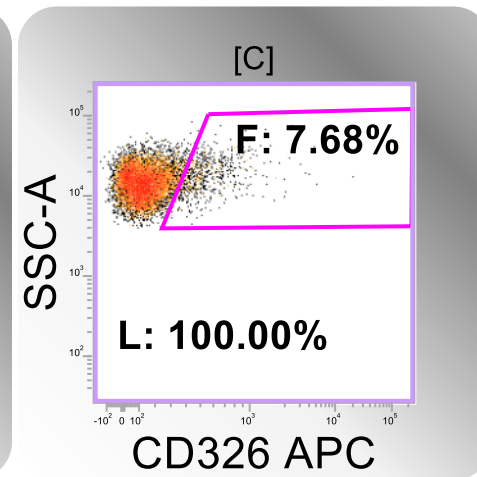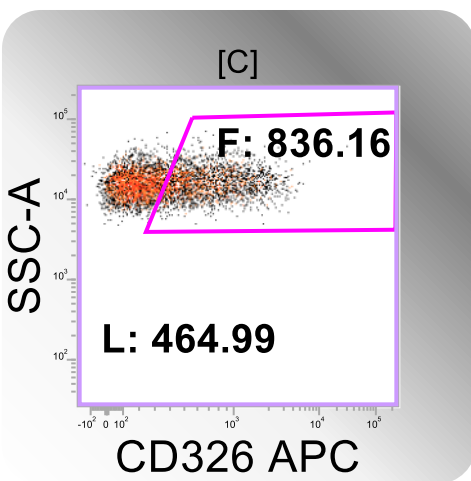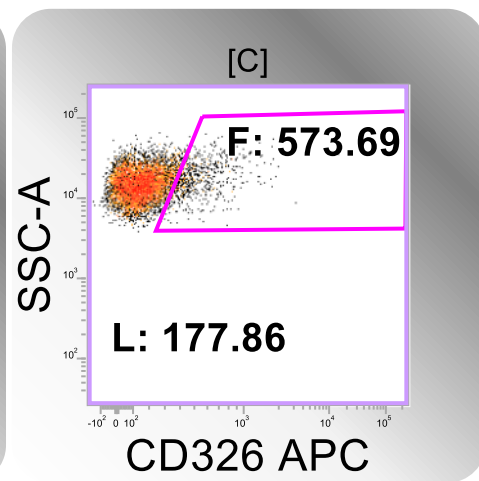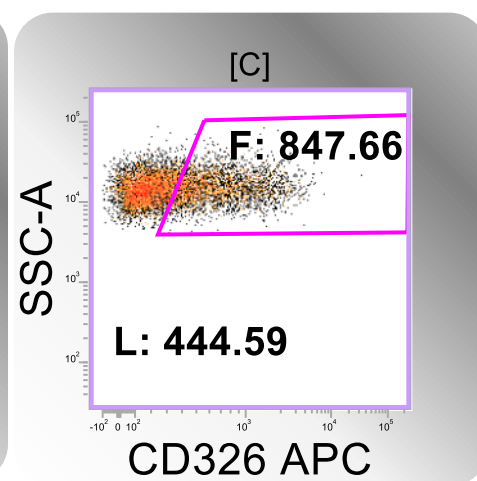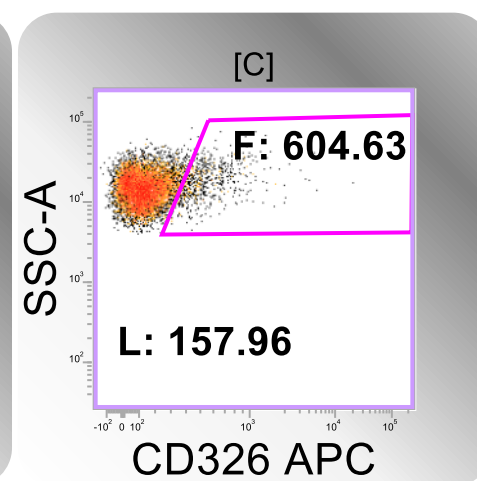

# A549GEV16/BOK

No TGF; No 4OHT

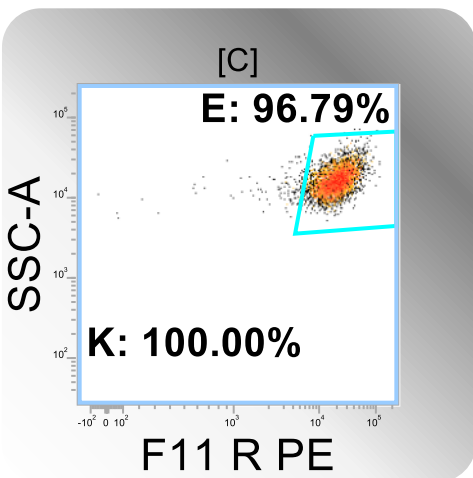

TGF; No 4OHT

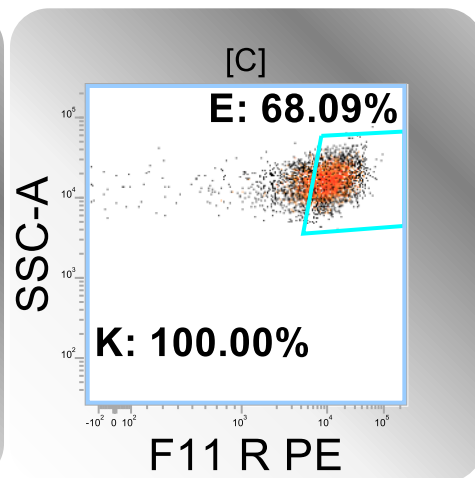

No TGF; 4OHT

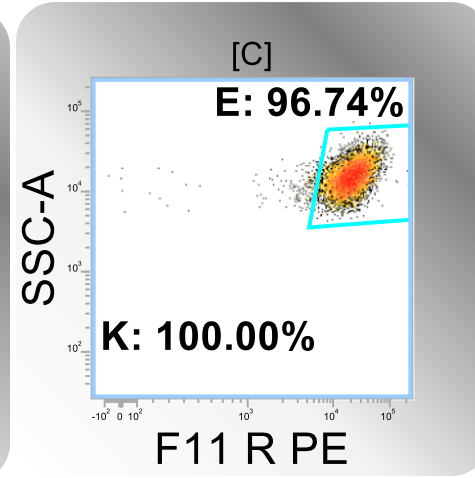

TGF; 4OHT

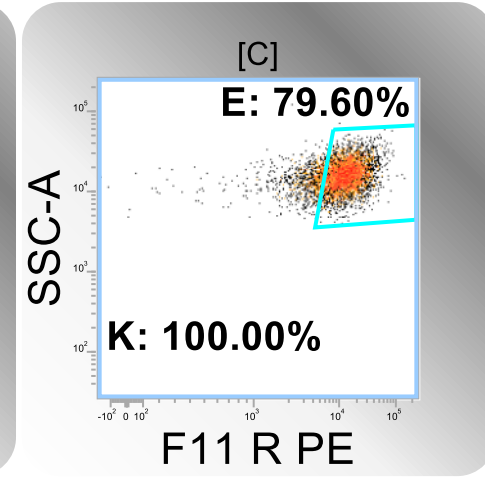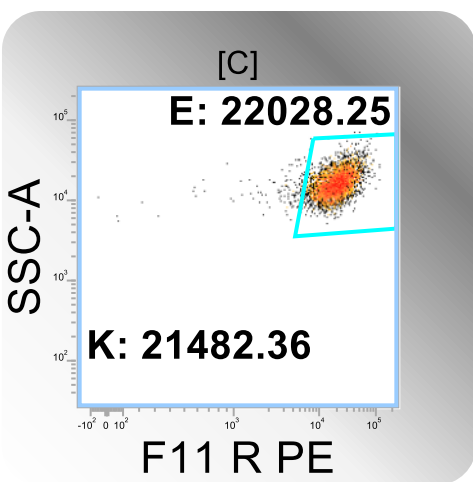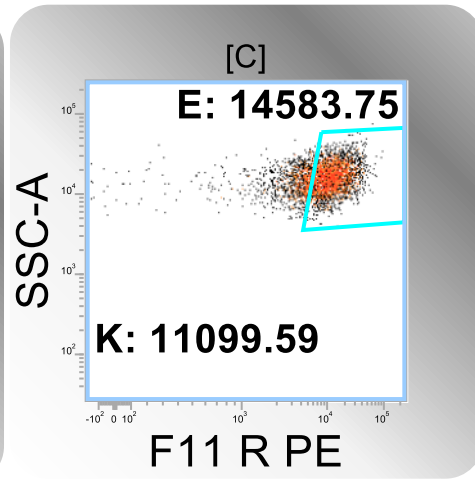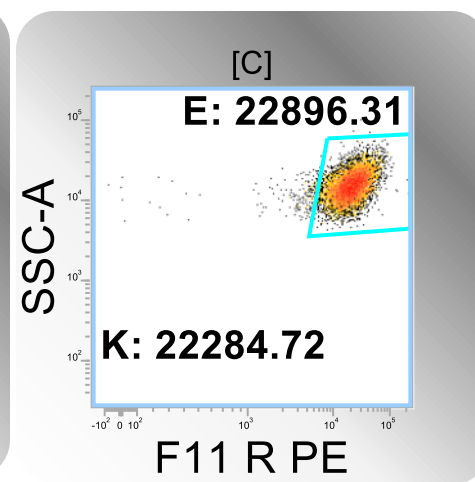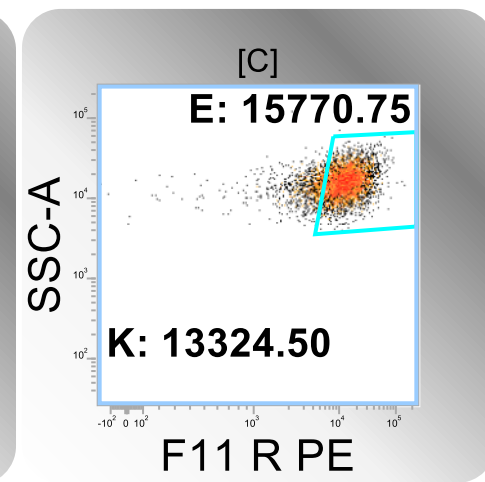

# A549GEV16/BOK

No TGF; No 4OHT

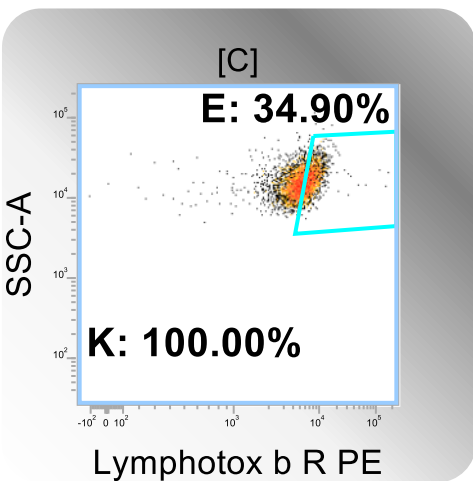

TGF; No 4OHT

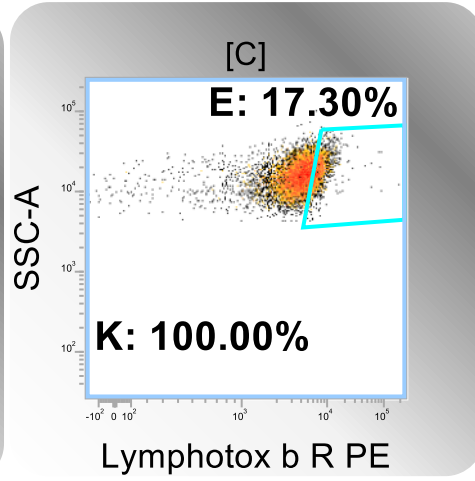

No TGF; 4OHT

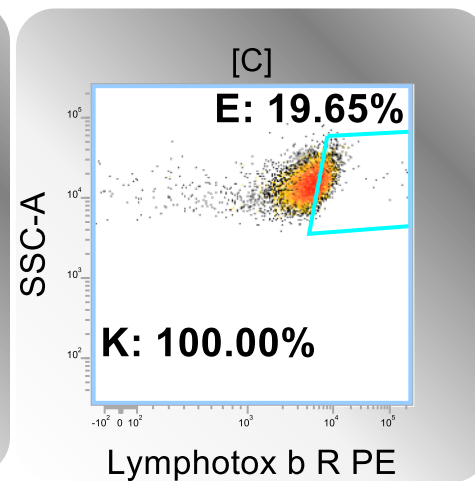

TGF; 4OHT

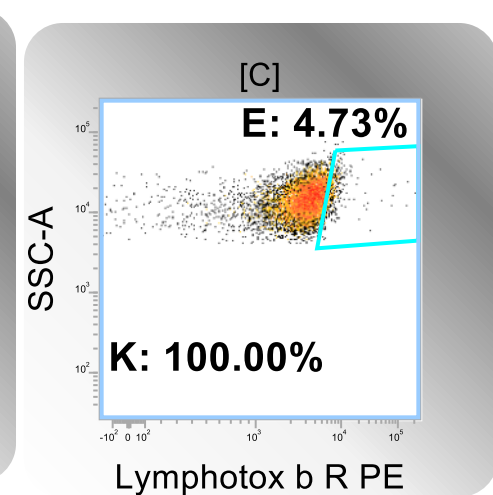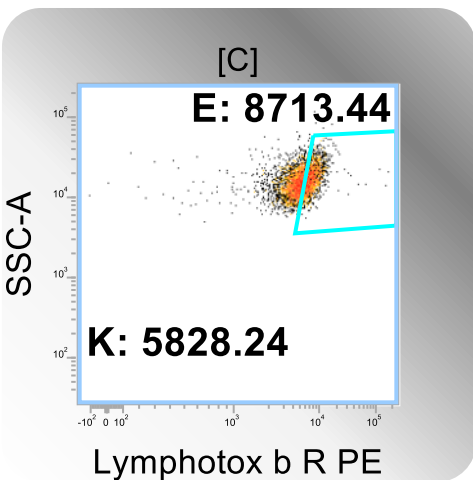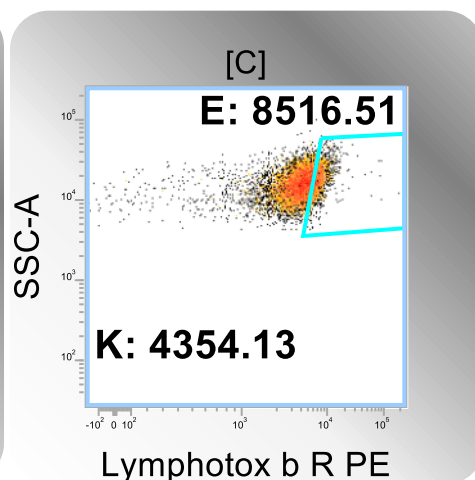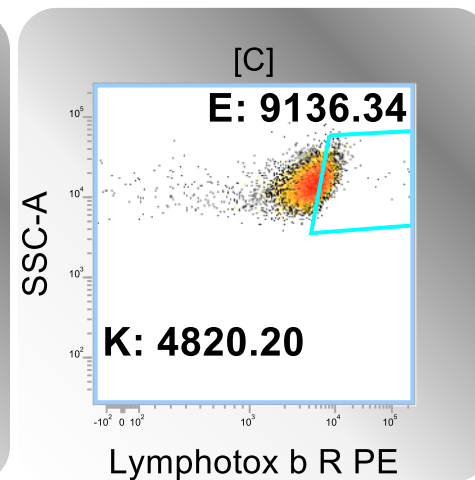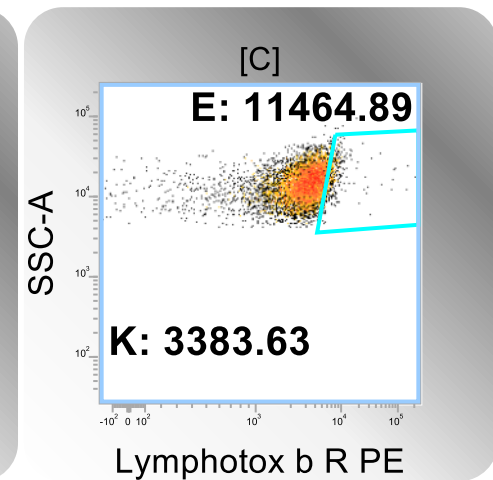

# A549GEV16/BOK

No TGF; No 4OHT

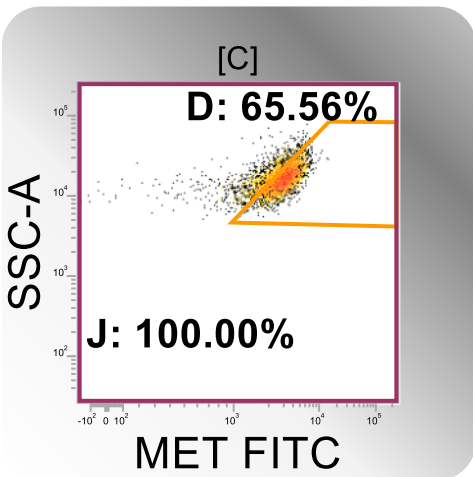

TGF; No 4OHT

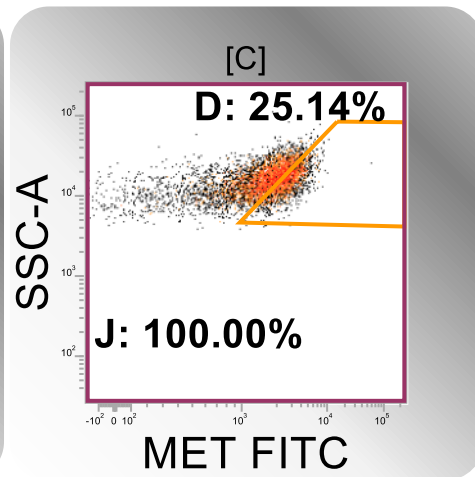

No TGF; 4OHT

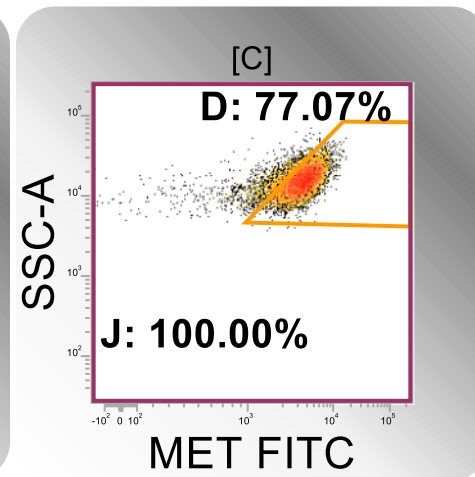

TGF; 4OHT

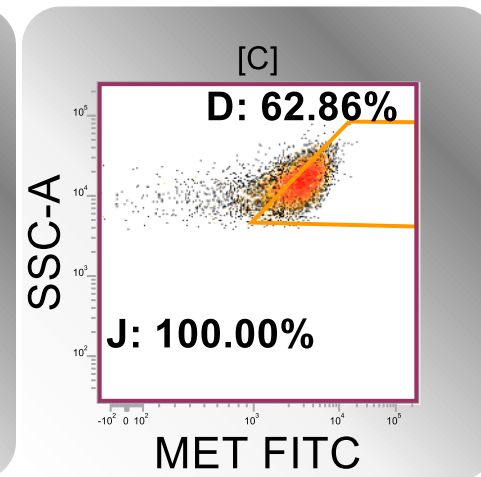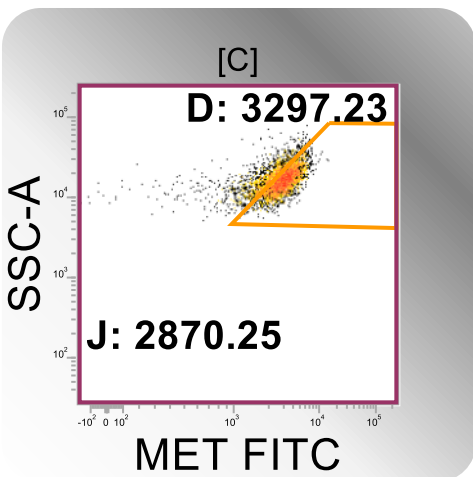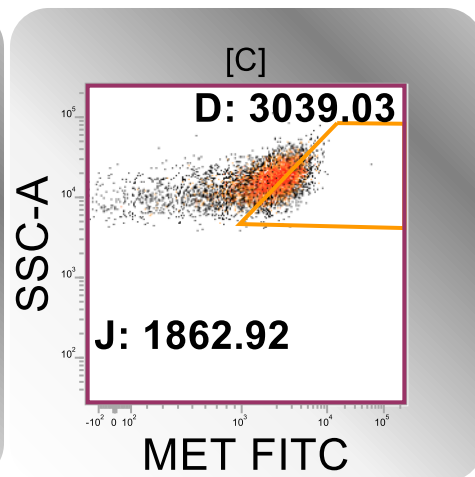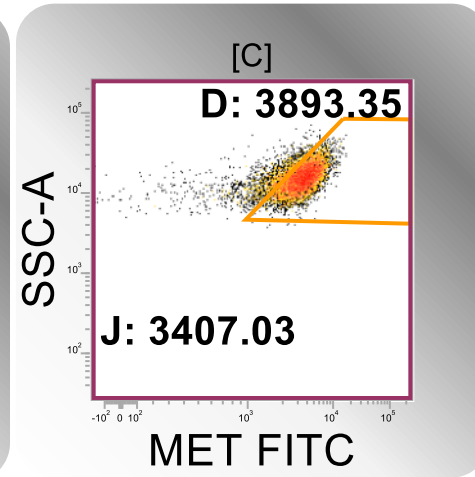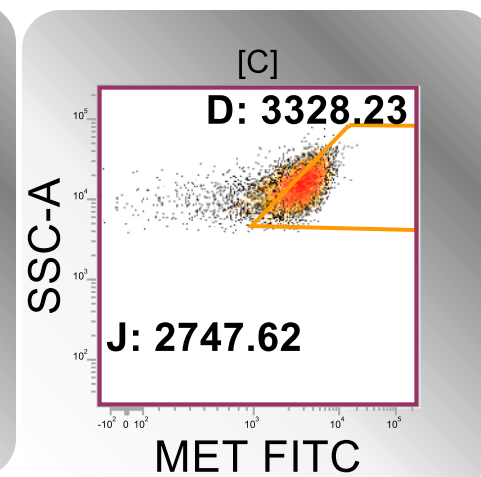



# IgG controls

# No TGF; No 4OHT

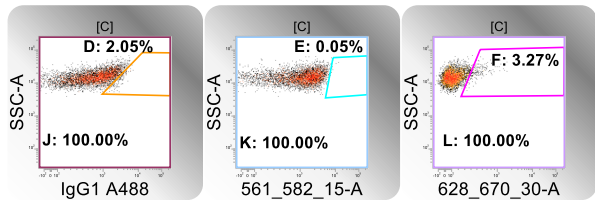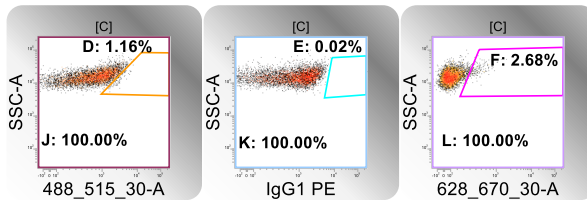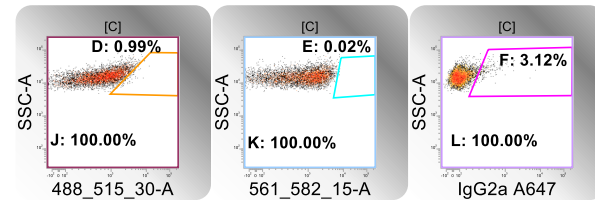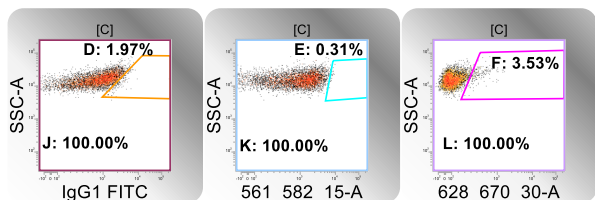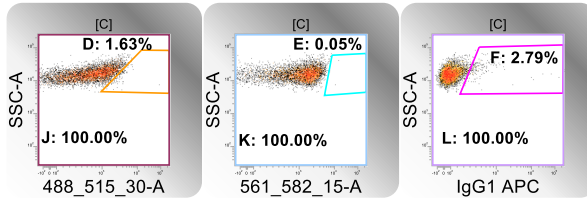

# TGF; No 4OHT

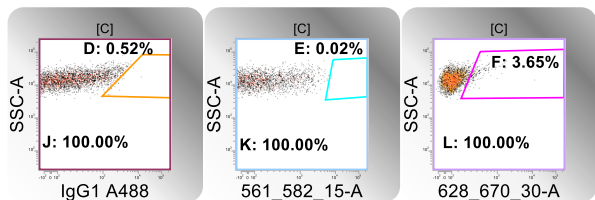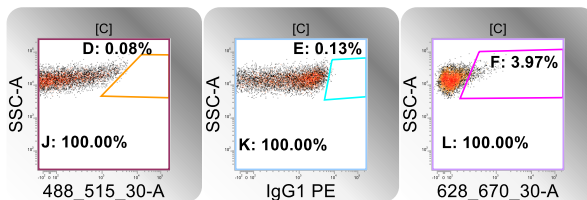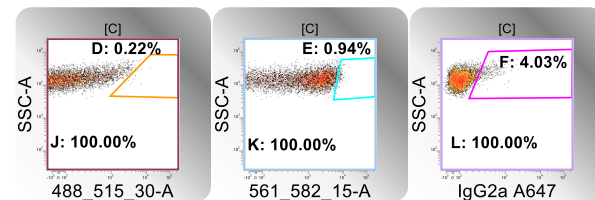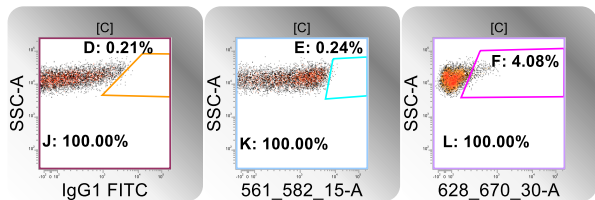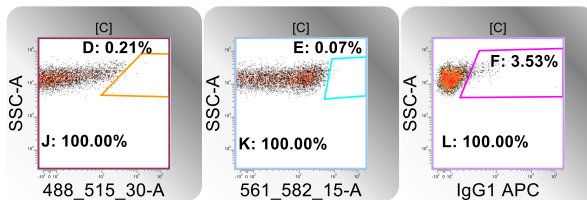

# IgG controls

# No TGF; 4OHT

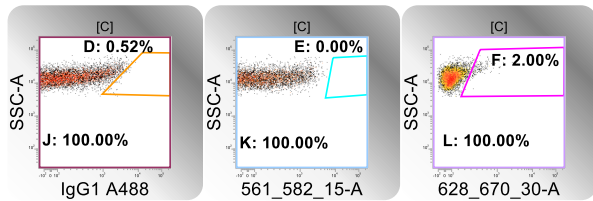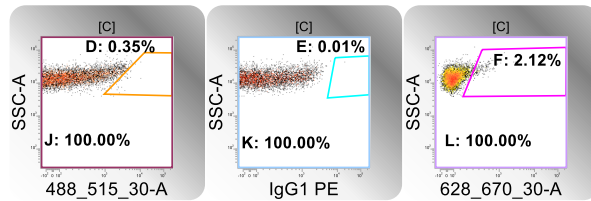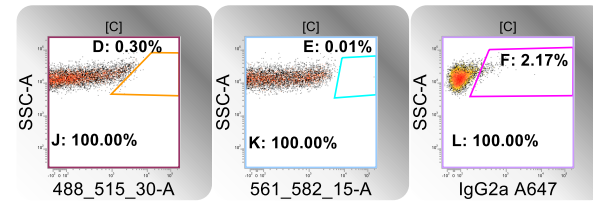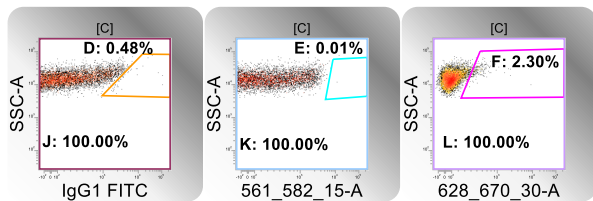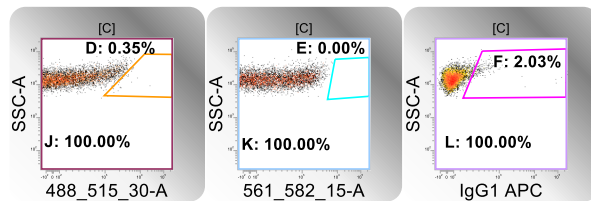

# TGF; 4OHT

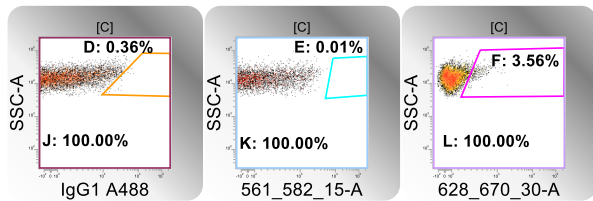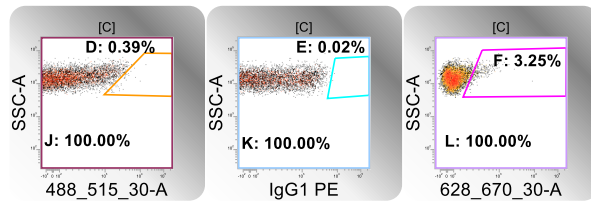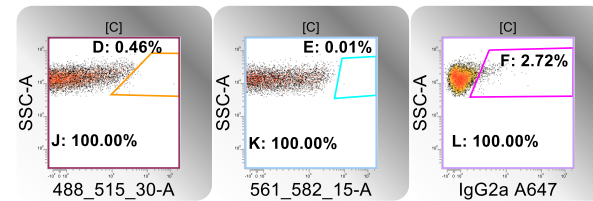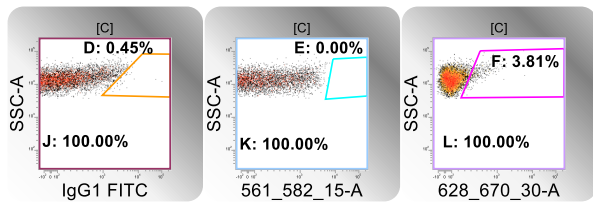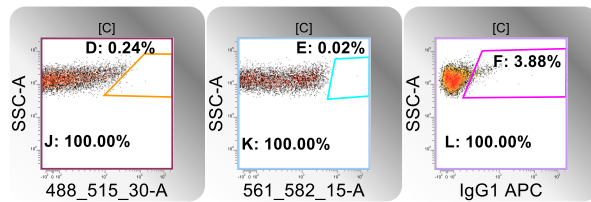

Supplement: NIHMS929830-supplement-Supp_DataS4.pdf [file NIHMS929830-supplement-Supp_DataS4.pdf]
