# Supplementary material
Source: PubMed Central journal article supplement (PMC5763244)
Supplement: NIHMS929830-supplement-Supp_DataS1.pdf [file NIHMS929830-supplement-Supp_DataS1.pdf]

Moravcikova et al. - Supplemental data S1

| <b>Age</b>                    |           |       |
|-------------------------------|-----------|-------|
|                               | Median    | 63.5  |
|                               | Range     | 39-78 |
| <b>Gender</b>                 |           |       |
|                               | Males     | 67    |
|                               | Females   | 35    |
| <b>Race</b>                   |           |       |
|                               | White     | 102   |
| <b>Smoking History</b>        |           |       |
|                               | No        | 14    |
|                               | Yes       | 88    |
| <b>T Stage</b>                |           |       |
|                               | T1        | 24    |
|                               | T2        | 67    |
|                               | T3        | 10    |
|                               | T4        | 1     |
| <b>N Stage</b>                |           |       |
|                               | N0        | 53    |
|                               | N1        | 31    |
|                               | N2        | 18    |
| <b>TNM Stage</b>              |           |       |
|                               | IA        | 16    |
|                               | IB        | 33    |
|                               | IIA       | 6     |
|                               | IIB       | 22    |
|                               | IIIA      | 22    |
|                               | IIIB      | 1     |
|                               | IV        | 2     |
| <b>Grade</b>                  |           |       |
|                               | 1         | 7     |
|                               | 1-2       | 2     |
|                               | 2         | 35    |
|                               | 2-3       | 8     |
|                               | 3         | 39    |
| <b>Histopathological type</b> |           |       |
|                               | SQCLC     | 46    |
|                               | LAC       | 43    |
|                               | SQCLC+LAC | 3     |
|                               | LCLC      | 3     |
|                               | SLC       | 3     |
|                               | UNDIF     | 4     |
