# Supplementary material
Source: PubMed Central journal article supplement (PMC5763244)
Supplement: NIHMS929830-supplement-Supp_DataS2.pdf [file NIHMS929830-supplement-Supp_DataS2.pdf]

## Moravcikova et al. - Supplemental data S2

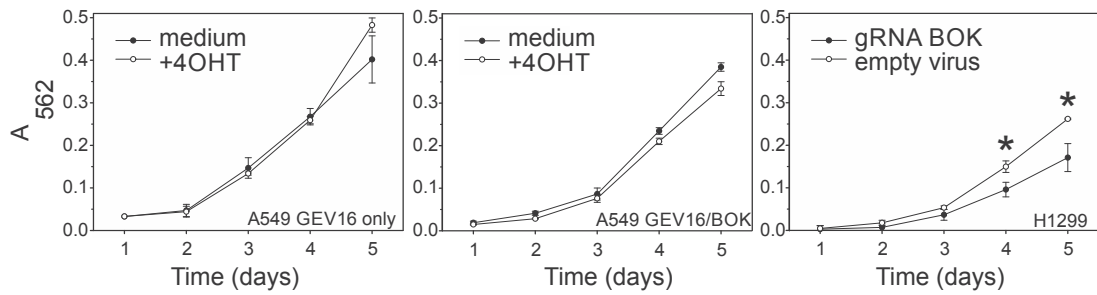

**Supplemental data S2.** BOK influences proliferation of H1299 and A549 cells. MTT assays of cell proliferation. Data represent mean  $\pm$  S.E.M. from 3 independent experiments. Asterisks indicate a  $P$  value lower than 0.05 analyzed by Student's t-test.
