# Supplementary material
Source: PubMed Central journal article supplement (PMC5763244)
Supplement: NIHMS929830-supplement-Supp_DataS3.pdf [file NIHMS929830-supplement-Supp_DataS3.pdf]

K-means clustering of protein expression in A549 GEV16/BOK cells: 0=no expression, 1=low expression, 2=moderate expression, 3=high expression

| REAGENT          | No BOK  | No BOK | BOK     | BOK  |
|------------------|---------|--------|---------|------|
|                  | No TGFb | TGFb   | No TGFb | TGFb |
| 488_515_30-A     | 0.4     | 0.0    | 0.0     | 0.0  |
| 561_582_15-A     | 0.0     | 0.0    | 0.0     | 0.0  |
| 628_670_30-A     | 0.8     | 0.8    | 0.8     | 0.8  |
| CCR1 A647        | 1.0     | 1.0    | 1.0     | 1.0  |
| CCR2 A647        | 1.0     | 1.0    | 1.0     | 1.0  |
| CCR3 A647        | 0.0     | 0.0    | 0.0     | 0.0  |
| CCR4 A647        | 1.0     | 1.0    | 1.0     | 1.0  |
| CCR6 PE          | 0.0     | 0.0    | 0.0     | 0.0  |
| CCR7 A647        | 1.0     | 1.0    | 1.0     | 1.0  |
| CCR8 APC         | 1.0     | 1.0    | 1.0     | 1.0  |
| CCR9 A647        | 1.0     | 1.0    | 1.0     | 1.0  |
| CD10 APC         | 1.0     | 1.0    | 1.0     | 1.0  |
| CD102 PE         | 0.0     | 0.0    | 0.0     | 0.0  |
| CD103 PE         | 0.0     | 0.0    | 0.0     | 0.0  |
| CD104 PE         | 1.0     | 1.0    | 1.0     | 1.0  |
| CD105 A488       | 1.0     | 0.0    | 0.0     | 1.0  |
| CD106 APC        | 1.0     | 1.0    | 1.0     | 1.0  |
| CD107a PE        | 0.0     | 0.0    | 0.0     | 0.0  |
| CD107b FITC      | 1.0     | 1.0    | 1.0     | 1.0  |
| CD108 PE         | 0.0     | 0.0    | 0.0     | 1.0  |
| CD109 PE         | 0.0     | 0.0    | 0.0     | 0.0  |
| CD110 PE         | 0.0     | 0.0    | 0.0     | 0.0  |
| CD112 PE         | 0.0     | 0.0    | 0.0     | 0.0  |
| CD114 APC        | 1.0     | 1.0    | 1.0     | 1.0  |
| CD116 FITC       | 1.0     | 1.0    | 1.0     | 1.0  |
| CD117 APC        | 1.0     | 1.0    | 1.0     | 1.0  |
| CD118 PE         | 0.0     | 0.0    | 0.0     | 0.0  |
| CD119 PE         | 1.0     | 0.0    | 0.0     | 0.0  |
| CD11a APC        | 1.0     | 1.0    | 1.0     | 1.0  |
| CD11b_Mac-1 A488 | 0.0     | 0.0    | 0.0     | 0.0  |
| CD11c APC        | 1.0     | 1.0    | 1.0     | 1.0  |
| CD120b PE        | 0.0     | 0.0    | 0.0     | 0.0  |
| CD122 PE         | 0.0     | 0.0    | 0.0     | 0.0  |
| CD123 FITC       | 1.0     | 0.0    | 0.0     | 0.0  |
| CD124 PE         | 0.0     | 0.0    | 0.0     | 0.0  |
| CD126 PE         | 0.0     | 0.0    | 0.0     | 0.0  |
| CD127 A647       | 1.0     | 1.0    | 1.0     | 1.0  |
| CD13 APC         | 3.0     | 3.0    | 3.0     | 3.0  |
| CD130 PE         | 1.0     | 0.0    | 1.0     | 0.0  |
| CD132 PE         | 0.0     | 0.0    | 0.0     | 0.0  |
| CD133 APC        | 0.0     | 0.0    | 0.0     | 1.0  |
| CD134 FITC       | 1.0     | 1.0    | 1.0     | 1.0  |

|              |     |     |     |     |
|--------------|-----|-----|-----|-----|
| CD135 PE     | 0.0 | 0.0 | 0.0 | 0.0 |
| CD137 APC    | 1.0 | 1.0 | 1.0 | 1.0 |
| CD137L PE    | 0.0 | 0.0 | 0.0 | 0.0 |
| CD138 FITC   | 0.0 | 0.0 | 0.0 | 0.0 |
| CD14 FITC    | 1.0 | 1.0 | 1.0 | 1.0 |
| CD140a PE    | 0.0 | 0.0 | 0.0 | 0.0 |
| CD140b PE    | 0.0 | 0.0 | 0.0 | 0.0 |
| CD141 PE     | 2.0 | 1.0 | 2.0 | 1.0 |
| CD142 PE     | 0.0 | 0.0 | 0.0 | 0.0 |
| CD146 PE     | 0.0 | 0.0 | 0.0 | 0.0 |
| CD147 FITC   | 3.0 | 3.0 | 3.0 | 3.0 |
| CD15 APC     | 1.0 | 1.0 | 1.0 | 1.0 |
| CD15 FITC    | 1.0 | 0.0 | 0.0 | 1.0 |
| CD150 PE     | 0.0 | 0.0 | 0.0 | 0.0 |
| CD151 PE     | 3.0 | 3.0 | 3.0 | 3.0 |
| CD154 APC    | 1.0 | 1.0 | 1.0 | 1.0 |
| CD158a FITC  | 1.0 | 0.0 | 0.0 | 0.0 |
| CD158b FITC  | 1.0 | 0.0 | 0.0 | 0.0 |
| CD16 A647    | 1.0 | 1.0 | 1.0 | 1.0 |
| CD161 APC    | 1.0 | 1.0 | 1.0 | 1.0 |
| CD162 PE     | 0.0 | 0.0 | 0.0 | 0.0 |
| CD163 PE     | 0.0 | 0.0 | 0.0 | 0.0 |
| CD164 FTIC   | 2.0 | 1.0 | 2.0 | 1.0 |
| CD166 PE     | 2.0 | 2.0 | 1.0 | 1.0 |
| CD16b PE     | 0.0 | 0.0 | 0.0 | 0.0 |
| CD172a A647  | 1.0 | 1.0 | 1.0 | 1.0 |
| CD172b PE    | 0.0 | 0.0 | 0.0 | 0.0 |
| CD178 A647   | 1.0 | 1.0 | 1.0 | 1.0 |
| CD18 PE      | 0.0 | 0.0 | 0.0 | 0.0 |
| CD180 PE     | 0.0 | 0.0 | 0.0 | 0.0 |
| CD181 APC    | 1.0 | 1.0 | 1.0 | 1.0 |
| CD183 PE     | 0.0 | 0.0 | 0.0 | 0.0 |
| CD184 PE     | 0.0 | 0.0 | 0.0 | 0.0 |
| CD19 A488    | 0.0 | 0.0 | 0.0 | 0.0 |
| CD195 APC    | 1.0 | 1.0 | 1.0 | 1.0 |
| CD1a APC     | 1.0 | 1.0 | 1.0 | 1.0 |
| CD1b FITC    | 1.0 | 1.0 | 1.0 | 1.0 |
| CD1d PE      | 0.0 | 0.0 | 0.0 | 0.0 |
| CD2 APC      | 1.0 | 1.0 | 1.0 | 1.0 |
| CD20 APC     | 1.0 | 1.0 | 1.0 | 1.0 |
| CD200 PE     | 0.0 | 0.0 | 0.0 | 0.0 |
| CD201 PE     | 1.0 | 0.0 | 0.0 | 0.0 |
| CD205 A647   | 1.0 | 1.0 | 1.0 | 1.0 |
| CD206 APC    | 1.0 | 1.0 | 1.0 | 1.0 |
| CD208 APC    | 1.0 | 1.0 | 1.0 | 1.0 |
| CD21 APC     | 1.0 | 1.0 | 1.0 | 1.0 |
| CD210 PE     | 0.0 | 0.0 | 0.0 | 0.0 |
| CD212 b1 APC | 1.0 | 1.0 | 1.0 | 1.0 |

|             |     |     |     |     |
|-------------|-----|-----|-----|-----|
| CD212 b2 PE | 0.0 | 0.0 | 0.0 | 0.0 |
| CD22 APC    | 1.0 | 1.0 | 1.0 | 1.0 |
| CD220 PE    | 0.0 | 0.0 | 0.0 | 0.0 |
| CD221 PE    | 1.0 | 1.0 | 1.0 | 0.0 |
| CD226 FITC  | 1.0 | 0.0 | 0.0 | 0.0 |
| CD227 FITC  | 1.0 | 1.0 | 1.0 | 1.0 |
| CD23 FITC   | 1.0 | 0.0 | 0.0 | 0.0 |
| CD231 PE    | 0.0 | 0.0 | 0.0 | 0.0 |
| CD235a APC  | 1.0 | 1.0 | 1.0 | 1.0 |
| CD24 FITC   | 2.0 | 1.0 | 2.0 | 1.0 |
| CD244 FITC  | 1.0 | 0.0 | 0.0 | 0.0 |
| CD25 APC    | 1.0 | 1.0 | 1.0 | 1.0 |
| CD252 PE    | 0.0 | 0.0 | 0.0 | 0.0 |
| CD256 PE    | 0.0 | 0.0 | 0.0 | 0.0 |
| CD26 FITC   | 1.0 | 0.0 | 1.0 | 0.0 |
| CD267 PE    | 0.0 | 0.0 | 0.0 | 0.0 |
| CD268 FITC  | 1.0 | 0.0 | 0.0 | 0.0 |
| CD27 APC    | 1.0 | 1.0 | 1.0 | 1.0 |
| CD271 PE    | 0.0 | 0.0 | 0.0 | 0.0 |
| CD275 PE    | 0.0 | 0.0 | 0.0 | 0.0 |
| CD278 PE    | 0.0 | 0.0 | 0.0 | 0.0 |
| CD28 APC    | 1.0 | 1.0 | 1.0 | 1.0 |
| CD282 A647  | 1.0 | 1.0 | 1.0 | 1.0 |
| CD29 APC    | 3.0 | 3.0 | 3.0 | 3.0 |
| CD294 A647  | 1.0 | 1.0 | 1.0 | 1.0 |
| CD3 A647    | 1.0 | 1.0 | 1.0 | 1.0 |
| CD30 FITC   | 1.0 | 0.0 | 0.0 | 0.0 |
| CD31 A647   | 1.0 | 1.0 | 1.0 | 1.0 |
| CD318 A647  | 3.0 | 3.0 | 3.0 | 3.0 |
| CD32 FITC   | 1.0 | 0.0 | 0.0 | 0.0 |
| CD326 APC   | 2.0 | 1.0 | 2.0 | 1.0 |
| CD33 APC    | 1.0 | 1.0 | 1.0 | 1.0 |
| CD336 A647  | 1.0 | 1.0 | 1.0 | 1.0 |
| CD337 A647  | 1.0 | 0.0 | 0.0 | 0.0 |
| CD34 APC    | 1.0 | 1.0 | 1.0 | 1.0 |
| CD349 A647  | 1.0 | 1.0 | 1.0 | 1.0 |
| CD35 FITC   | 1.0 | 0.0 | 0.0 | 0.0 |
| CD36 APC    | 1.0 | 1.0 | 1.0 | 1.0 |
| CD37 FITC   | 1.0 | 0.0 | 0.0 | 0.0 |
| CD38 FITC   | 2.0 | 1.0 | 2.0 | 1.0 |
| CD39 APC    | 1.0 | 1.0 | 1.0 | 1.0 |
| CD4 A647    | 1.0 | 1.0 | 1.0 | 1.0 |
| CD4 APC     | 1.0 | 1.0 | 1.0 | 1.0 |
| CD4 v4 FITC | 1.0 | 0.0 | 0.0 | 0.0 |
| CD40 FITC   | 1.0 | 0.0 | 0.0 | 0.0 |
| CD41a FITC  | 1.0 | 0.0 | 0.0 | 0.0 |
| CD41b FITC  | 1.0 | 0.0 | 0.0 | 0.0 |
| CD42a FITC  | 1.0 | 0.0 | 0.0 | 0.0 |

|              |     |     |     |     |
|--------------|-----|-----|-----|-----|
| CD42b APC    | 1.0 | 1.0 | 1.0 | 1.0 |
| CD43 FITC    | 1.0 | 0.0 | 0.0 | 0.0 |
| CD44 APC     | 3.0 | 3.0 | 3.0 | 3.0 |
| CD45 FITC    | 0.0 | 0.0 | 0.0 | 0.0 |
| CD45 RA FITC | 1.0 | 0.0 | 0.0 | 0.0 |
| CD45 RO FITC | 1.0 | 0.0 | 0.0 | 0.0 |
| CD45RB PE    | 0.0 | 0.0 | 0.0 | 0.0 |
| CD46 FITC    | 3.0 | 3.0 | 3.0 | 3.0 |
| CD47 FITC    | 3.0 | 3.0 | 3.0 | 3.0 |
| CD48 FITC    | 1.0 | 0.0 | 1.0 | 0.0 |
| CD49a PE     | 0.0 | 1.0 | 0.0 | 1.0 |
| CD49b FITC   | 3.0 | 3.0 | 3.0 | 3.0 |
| CD49c PE     | 3.0 | 3.0 | 3.0 | 3.0 |
| CD49d PE     | 0.0 | 0.5 | 0.0 | 0.0 |
| CD49e PE     | 3.0 | 3.0 | 3.0 | 3.0 |
| CD49f FITC   | 2.5 | 2.0 | 2.0 | 2.0 |
| CD5 APC      | 1.0 | 1.0 | 1.0 | 1.0 |
| CD50 FITC    | 1.0 | 0.0 | 0.0 | 0.0 |
| CD51_61 FITC | 1.0 | 1.0 | 1.0 | 1.0 |
| CD53 PE      | 0.0 | 0.0 | 0.0 | 0.0 |
| CD54 APC     | 3.0 | 2.0 | 3.0 | 2.0 |
| CD55 APC     | 3.0 | 3.0 | 3.0 | 3.0 |
| CD56 A488    | 1.0 | 0.0 | 0.0 | 0.0 |
| CD57 FITC    | 1.0 | 0.0 | 1.0 | 1.0 |
| CD58 FITC    | 3.0 | 3.0 | 3.0 | 3.0 |
| CD59 FITC    | 3.0 | 3.0 | 3.0 | 3.0 |
| CD6 FITC     | 0.0 | 0.0 | 0.0 | 0.0 |
| CD61 PE      | 1.0 | 1.0 | 1.0 | 1.0 |
| CD62E APC    | 1.0 | 1.0 | 1.0 | 1.0 |
| CD62L APC    | 1.0 | 1.0 | 1.0 | 1.0 |
| CD62P APC    | 1.0 | 1.0 | 1.0 | 1.0 |
| CD63 FITC    | 3.0 | 3.0 | 3.0 | 3.0 |
| CD64 FITC    | 1.0 | 0.0 | 0.0 | 0.0 |
| CD66 PE      | 1.0 | 1.0 | 1.0 | 1.0 |
| CD66b FITC   | 1.0 | 0.0 | 1.0 | 1.0 |
| CD69 PE      | 0.0 | 0.0 | 0.0 | 0.0 |
| CD7 FITC     | 1.0 | 0.0 | 0.0 | 1.0 |
| CD70 FITC    | 3.0 | 2.0 | 2.0 | 2.0 |
| CD71 APC     | 3.0 | 2.0 | 2.0 | 2.0 |
| CD72 FITC    | 1.0 | 0.0 | 0.0 | 0.0 |
| CD73 PE      | 3.0 | 3.0 | 3.0 | 3.0 |
| CD74 FITC    | 1.0 | 0.0 | 0.0 | 0.0 |
| CD75 FITC    | 1.0 | 1.0 | 1.0 | 1.0 |
| CD77 FITC    | 1.0 | 0.0 | 0.0 | 0.0 |
| CD79a APC    | 1.0 | 1.0 | 1.0 | 1.0 |
| CD79b FITC   | 1.0 | 0.0 | 0.0 | 0.0 |
| CD80 PE      | 0.0 | 0.0 | 0.0 | 0.0 |
| CD81 APC     | 3.0 | 3.0 | 3.0 | 3.0 |

|                  |     |     |     |     |
|------------------|-----|-----|-----|-----|
| CD85 FITC        | 0.0 | 0.0 | 0.0 | 0.0 |
| CD86 APC         | 1.0 | 1.0 | 1.0 | 1.0 |
| CD87 PE          | 0.0 | 0.0 | 0.0 | 0.0 |
| CD88 PE          | 0.0 | 0.0 | 0.0 | 0.0 |
| CD89 PE          | 0.0 | 0.0 | 0.0 | 0.0 |
| CD8A647          | 1.0 | 1.0 | 1.0 | 1.0 |
| CD9 APC          | 3.0 | 3.0 | 3.0 | 3.0 |
| CD90 APC         | 2.0 | 2.0 | 2.0 | 2.0 |
| CD91 FITC        | 1.0 | 1.0 | 1.0 | 1.0 |
| CD94 APC         | 3.0 | 3.0 | 2.0 | 3.0 |
| CD95 FITC        | 3.0 | 3.0 | 3.0 | 3.0 |
| CD97 FITC        | 1.0 | 0.0 | 0.0 | 0.0 |
| CD98 FITC        | 3.0 | 3.0 | 3.0 | 3.0 |
| CD99 FITC        | 1.0 | 0.0 | 0.0 | 0.0 |
| CDw329 FITC      | 1.0 | 0.0 | 0.0 | 0.0 |
| CDw93 FITC       | 1.0 | 0.0 | 0.0 | 0.0 |
| CLA FITC         | 1.0 | 0.0 | 0.0 | 0.0 |
| CXCR2 FITC       | 1.0 | 0.0 | 0.0 | 0.0 |
| CXCR5 A488       | 1.0 | 0.0 | 0.0 | 0.0 |
| EGFR PE          | 1.0 | 2.0 | 1.0 | 1.0 |
| F11 R PE         | 3.0 | 2.0 | 3.0 | 3.0 |
| FGFR3 FITC       | 1.0 | 1.0 | 1.0 | 1.0 |
| FMC7 FITC        | 1.0 | 0.0 | 0.0 | 0.0 |
| HER-2_neu APC    | 3.0 | 3.0 | 3.0 | 3.0 |
| HLA_A_B_C PE     | 1.0 | 1.0 | 1.0 | 1.0 |
| HLA_DR FITC      | 1.0 | 0.0 | 0.0 | 0.0 |
| IgG1 A488        | 1.0 | 0.0 | 0.0 | 0.0 |
| IgG1 APC         | 1.0 | 1.0 | 1.0 | 1.0 |
| IgG1 FITC        | 1.0 | 0.0 | 0.0 | 0.0 |
| IgG1 PE          | 0.0 | 0.0 | 0.0 | 0.0 |
| IgG2a A647       | 1.0 | 1.0 | 1.0 | 1.0 |
| Integrin b7 APC  | 1.0 | 1.0 | 1.0 | 1.0 |
| KDR APC          | 1.0 | 1.0 | 1.0 | 1.0 |
| LAIR1 PE         | 0.0 | 0.0 | 0.0 | 0.0 |
| Leukotri B4 R PE | 0.0 | 0.0 | 0.0 | 0.0 |
| Lymphotox b R PE | 2.0 | 1.0 | 1.0 | 1.0 |
| MET FITC         | 2.0 | 1.0 | 3.0 | 2.0 |
| MIC_A_B PE       | 0.0 | 0.0 | 0.0 | 0.0 |
| NKB1 FITC        | 3.0 | 3.0 | 3.0 | 3.0 |
| NKG2D PE         | 0.0 | 0.0 | 0.0 | 0.0 |
| NKp46 PE         | 0.0 | 0.0 | 0.0 | 0.0 |
| PAC_1 FITC       | 0.0 | 0.0 | 0.0 | 0.0 |
| PD-L2 APC        | 1.0 | 1.0 | 1.0 | 1.0 |
| SSEA3 PE         | 0.0 | 0.0 | 0.0 | 0.0 |
| SSEA4 FITC       | 1.0 | 0.0 | 0.0 | 0.0 |
| TGFBR2 PE        | 0.0 | 0.0 | 0.0 | 0.0 |
| TNF APC          | 1.0 | 1.0 | 1.0 | 1.0 |
| TRA_1_60 Ag PE   | 0.0 | 0.0 | 0.0 | 0.0 |

|                  |     |     |     |     |
|------------------|-----|-----|-----|-----|
| TRA_1_81 Ag FITC | 1.0 | 0.0 | 0.0 | 0.0 |
| TWEAK PE         | 0.0 | 0.0 | 0.0 | 0.0 |
| fMLP R PE        | 0.0 | 0.0 | 0.0 | 0.0 |
| p_gp FITC        | 1   | 1   | 0   | 1   |
