# Supplementary material
Source: PubMed Central journal article supplement (PMC5763244)
Supplement: NIHMS929830-supplement-Supp_DataS5.pdf [file NIHMS929830-supplement-Supp_DataS5.pdf]

## Moravcikova et al. - Supplemental data S5

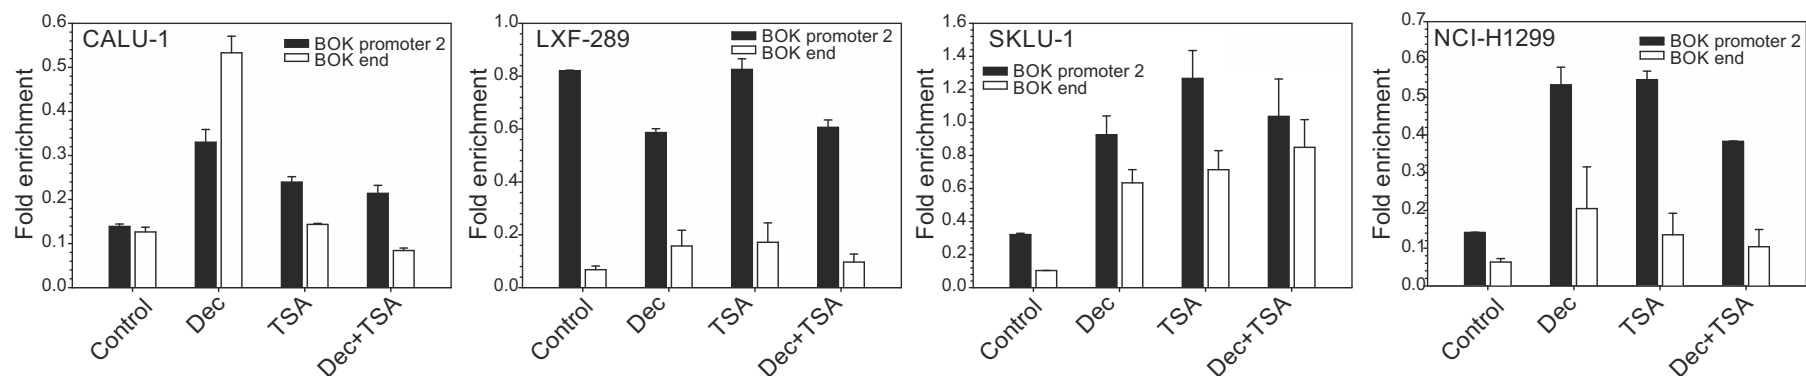

**Supplemental data S5.** Acetylated H3K9 active chromatin mark in the BOK gene in NSCLC cells. NSCLC cells treated with decitabine(72h) and/or trichostatin A (24h) were analyzed by CHIP with anti-H3K9Ac and IgG, followed by qPCR analysis of amplicons in the promoter region and in the end of the BOK gene (internal control). Error bars indicate the standard error of the mean (SEM) of two biological replicates.
